# Supplementary material for: Complexation and redox chemistry of neptunium, plutonium and americium with a hydroxylaminato ligand
Source: Royal Society of Chemistry journal article supplement (doi:10.1039/d1sc03905a), 2021-01-01
Supplement: d1sc03905a1.pdf [file d1sc03905a1.pdf]

## Supporting Information

### Complexation and Redox Chemistry of Neptunium, Plutonium and Americium with a Hydroxylaminate Ligand

Jing Su,<sup>‡a</sup> Thibault Cheisson,<sup>b</sup> Alex McSkimming,<sup>b</sup> Conrad A. P. Goodwin,<sup>c</sup> Ida M. DiMucci,<sup>c</sup>  
Thomas Albrecht-Schönzart,<sup>d</sup> Brian L. Scott,<sup>e</sup> Enrique R. Batista,<sup>a,\*</sup> Andrew J. Gaunt,<sup>c,\*</sup> Stosh  
A. Kozimor,<sup>c,\*</sup> Ping Yang,<sup>a,\*</sup> Eric J. Schelter<sup>b,\*</sup>

<sup>a</sup>Theoretical Division, Los Alamos National Laboratory, Los Alamos, New Mexico 87545, USA

<sup>b</sup>P. Roy and Diana T. Vagelos Laboratories, Department of Chemistry, University of  
Pennsylvania, 231 S 34th St., Philadelphia, Pennsylvania 19104, United States

<sup>c</sup>Chemistry Division, Los Alamos National Laboratory, Los Alamos, New Mexico 87545, USA

<sup>d</sup>Department of Chemistry and Biochemistry, Florida State University, 95 Chieftan Way,  
Tallahassee, Florida 32306, USA.

<sup>e</sup>Materials and Physics Applications Division, Los Alamos National Laboratory, Los Alamos,  
New Mexico 87545, USA

<sup>‡</sup> current address: School of Chemistry, Sichuan University, Chengdu 610064, China

\*To whom correspondence should be addressed. Email: [erb@lanl.gov](mailto:erb@lanl.gov), [gaunt@lanl.gov](mailto:gaunt@lanl.gov),  
[kozimor@lanl.gov](mailto:kozimor@lanl.gov), [schelter@sas.upenn.edu](mailto:schelter@sas.upenn.edu), [pyang@lanl.gov](mailto:pyang@lanl.gov)

## Table of Contents

|                                                                           |    |
|---------------------------------------------------------------------------|----|
| Miniaturization and optimization of synthetic protocols with cerium       | 3  |
| Photographs of americium(III)-hydroxylaminato complex synthesis, <b>3</b> | 11 |
| Crystallographic data                                                     | 14 |
| NMR spectra                                                               | 15 |
| UV-Vis-NIR spectra                                                        | 17 |
| Additional computational data                                             | 21 |

### Detailed miniaturization procedure for the synthesis of $[\text{Ce}_2(\text{PyNO})_6]$

The photographs and notes that follow demonstrate the level of planning and strategic approach that went into the experimental design and pre-optimization with cerium before attempting americium chemistry with the scarce and expensive  $^{243}\text{Am}$  isotope.

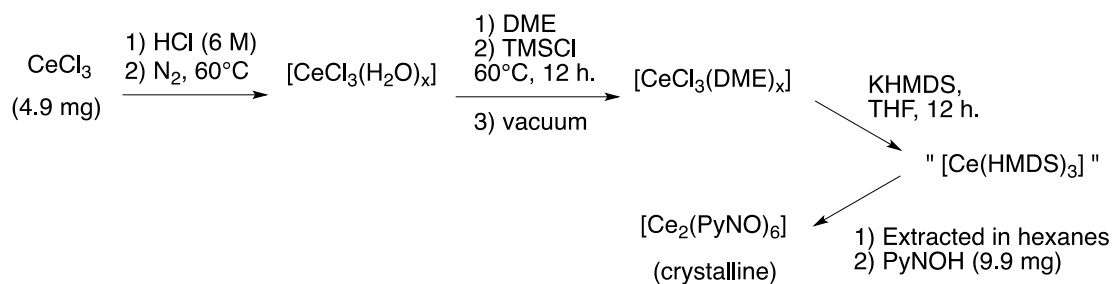

**Figure S1.** Overview of miniaturized procedure (~5 mg in metal content) developed for the synthesis of  $\text{Ce}[\text{N}(\text{SiMe}_3)_2]_3$  and hydroxylaminate complexes from hydrated Ce salts. This protocol was then adopted for the synthesis of **3**, and Am(III)-hydroxylaminate complex. HMDS =  $[\text{N}(\text{SiMe}_3)_2]^{1-}$ .

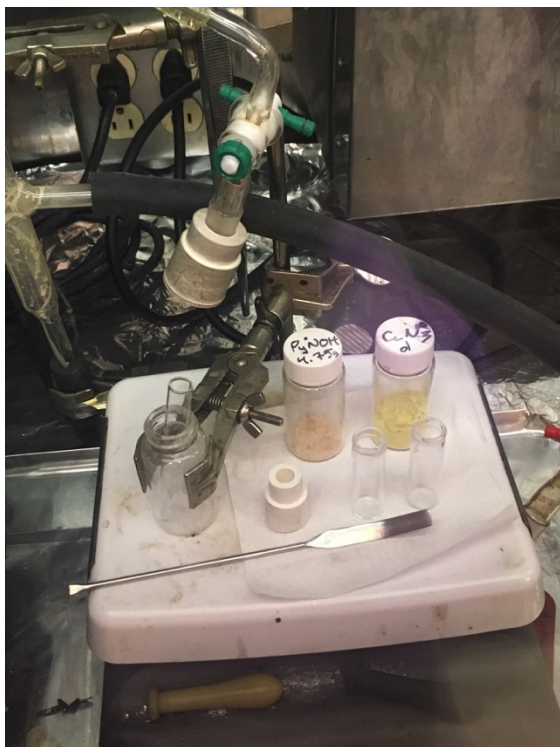

**Figure S2.**

Glassware:

- A small test tube (Fisher, 10 x 75 mm, #14-961-25)
- A small septum (Kimble, size 14, #774261-0014)
- Two small vials

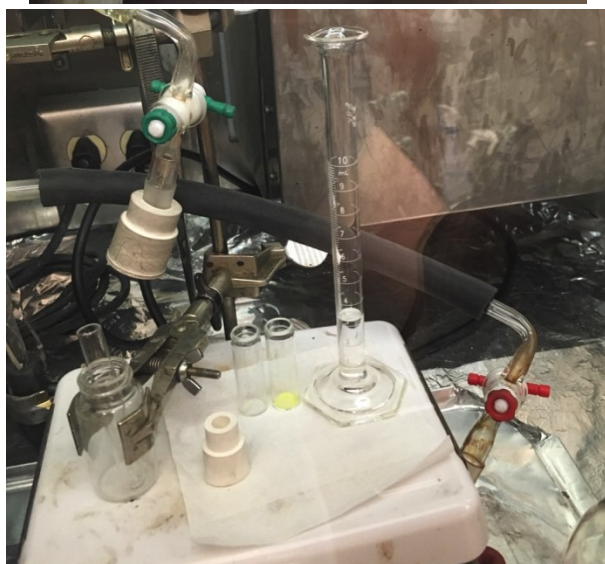

**Figure S3.**

**PyNOH** (7.1 mg, 42.7  $\mu\text{mol}$ , 3 equiv.) and **Ce[N(SiMe<sub>3</sub>)<sub>2</sub>]<sub>3</sub>·(Toluene)<sub>0.25</sub>** (9.2 mg, 14.3  $\mu\text{mol}$ , 1 equiv.) were weighed into two separate vials.

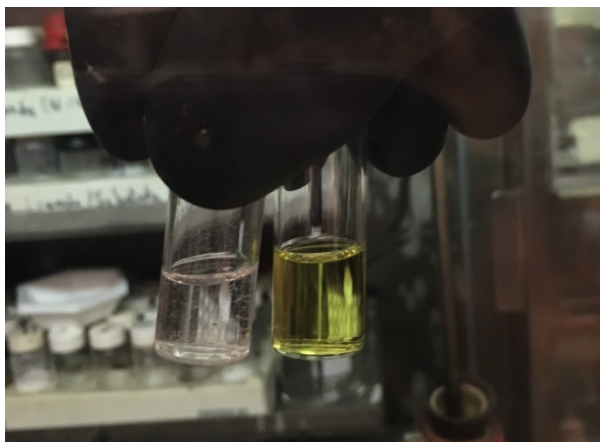

**Figure S4.**

Both solids were dissolved in 1.5 mL of hexanes. Solutions were mixed with a pipette to produce clear solutions.

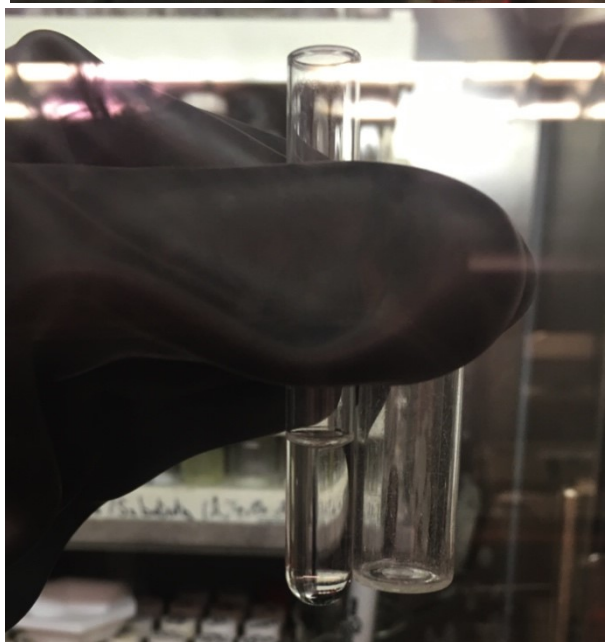

**Figures S5-S8.**

The solution of **PyNOH** was added in the test tube.

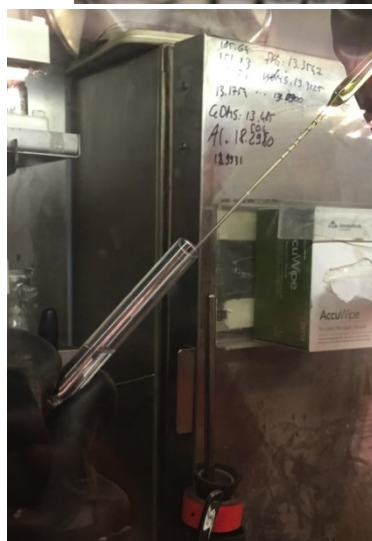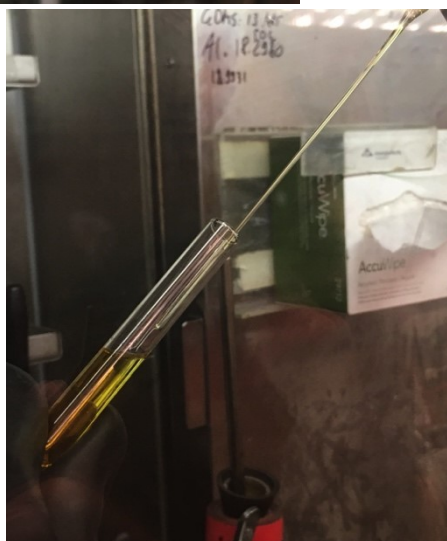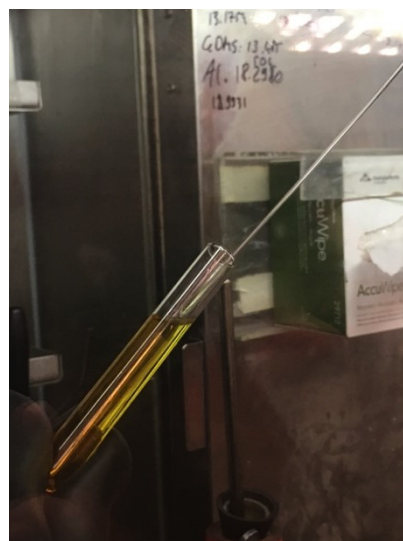

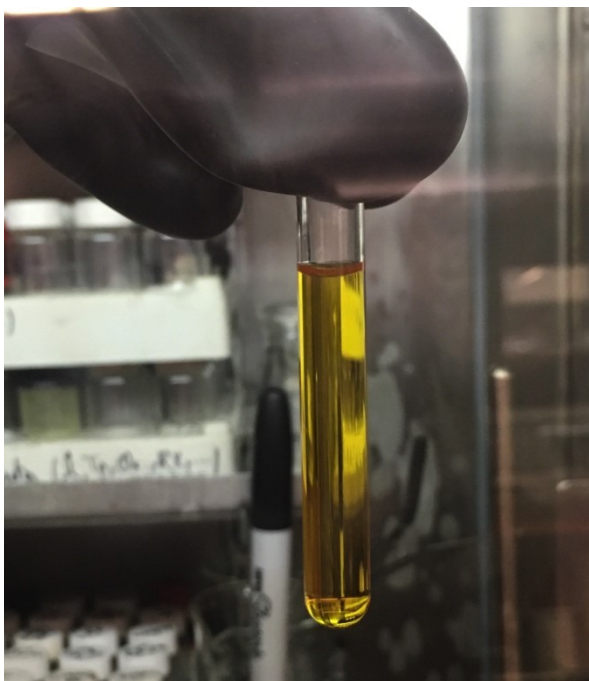

**Figure S9.**

The solution of  $\text{Ce}[\text{N}(\text{SiMe}_3)_2]_3$  was gently added on the top of the **PyNOH** solution leading to a clear solution.

A more careful layering can be achieved if necessary but is not required in this range of concentrations.

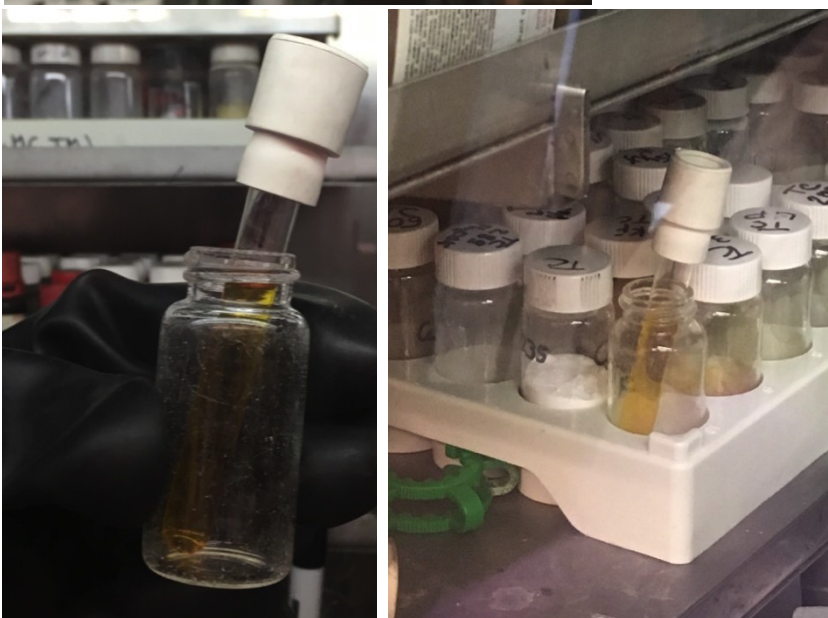

**Figures S10-S11.**

The test tube was capped with the septum and set undisturbed for 4 hours. Crystal seeds can be observed after one hour.



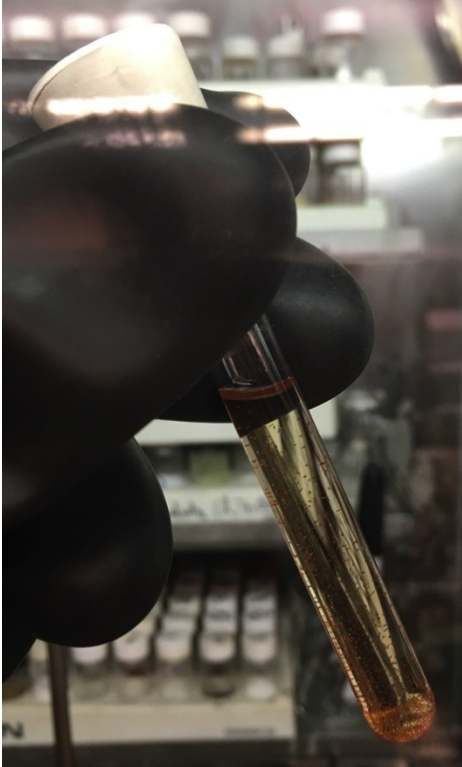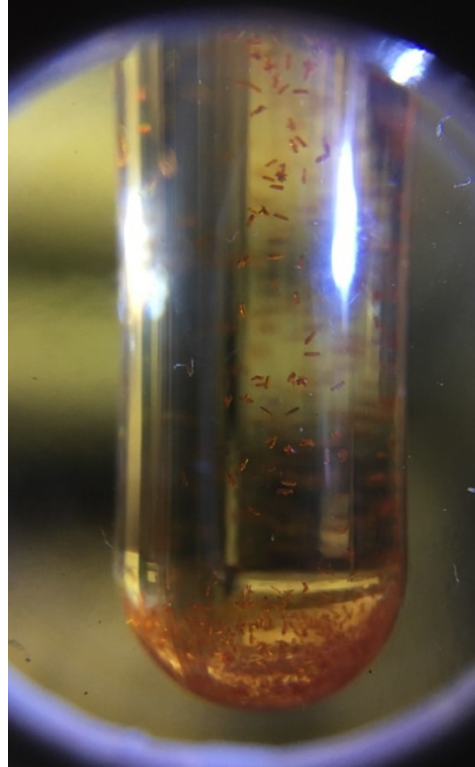

**Figures S12-S13.**

After 4 hours of standing, X-ray quality crystals have formed.

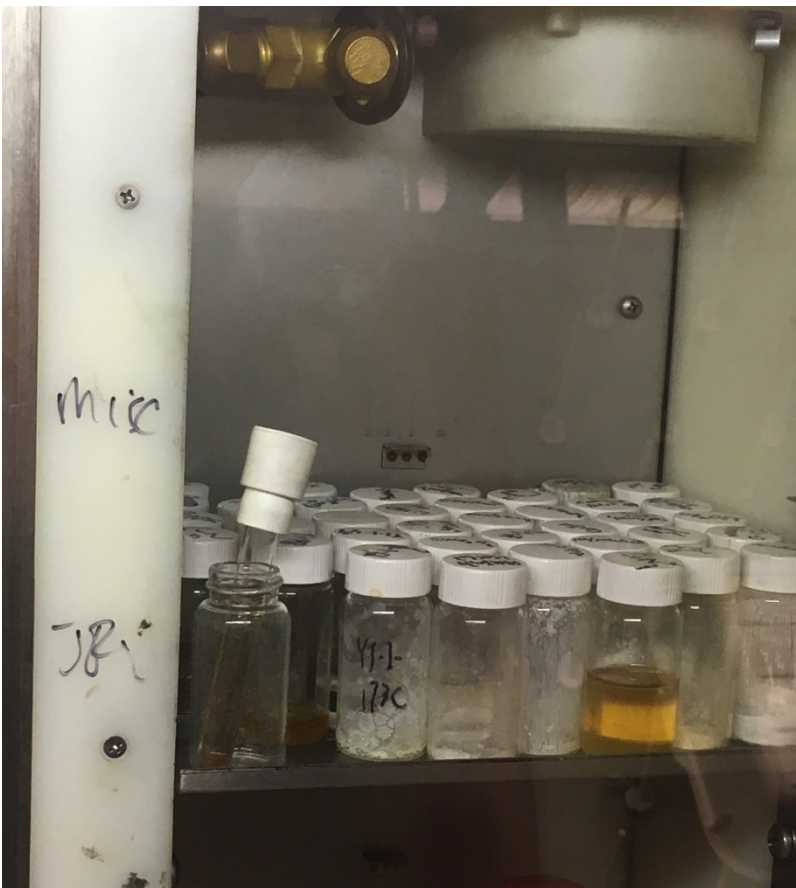

**Figure S14.**

To stimulate the crystallization, the tube was placed in a freezer (-25°C) for 5 hours.

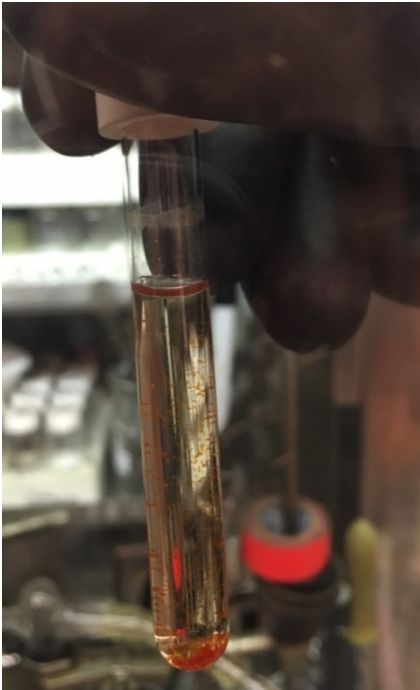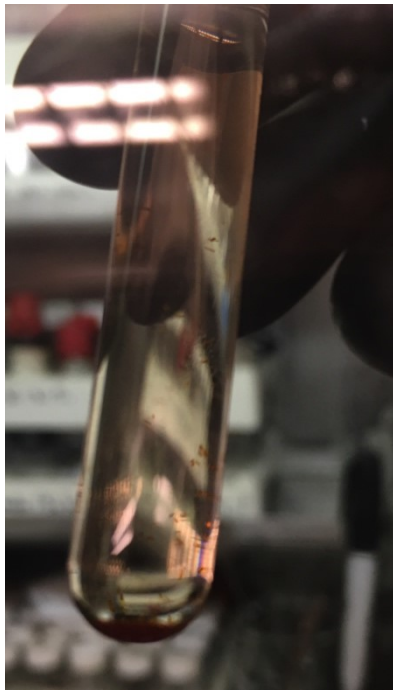

**Figures S15-S16.**

After 5 hours at -25°C, red crystals of **1** and a slightly yellow solution were obtained. The tube was gently shaken and tapped to detach the crystals from the walls and allowed them to fall by gravity.



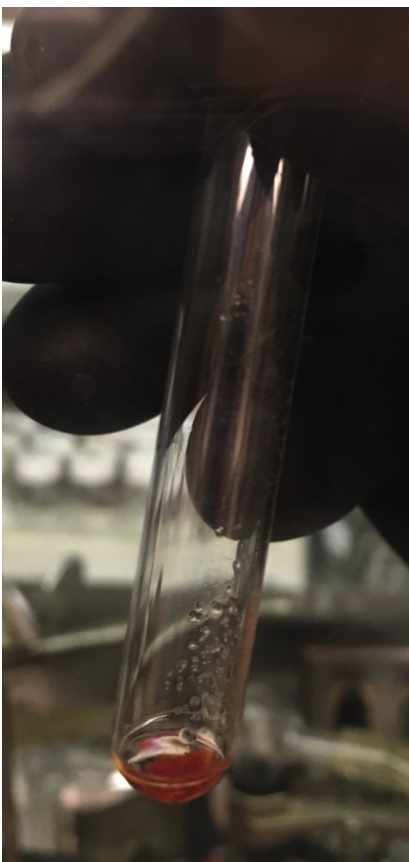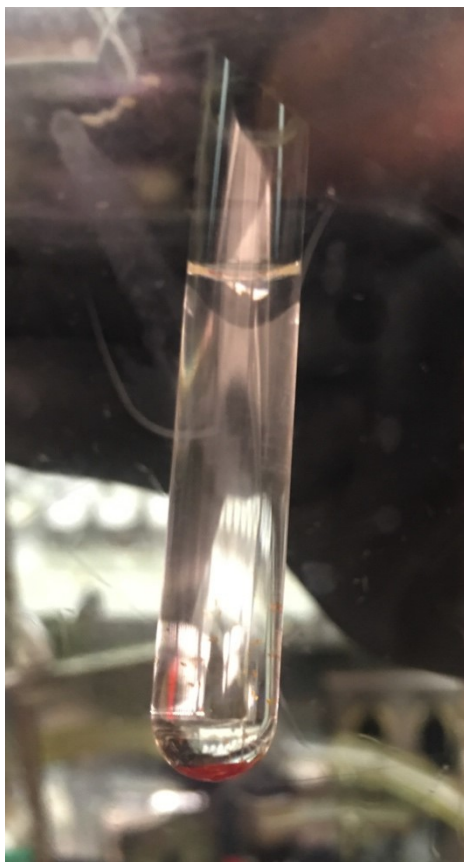

**Figures S17-S18.**

The supernatant was carefully removed with a pipette.

The crystals were suspended in 2.5 mL of pentane, allowed to decant by gravity and the supernatant removed carefully with a pipette. This operation was repeated four times (4 x 2.5 mL).

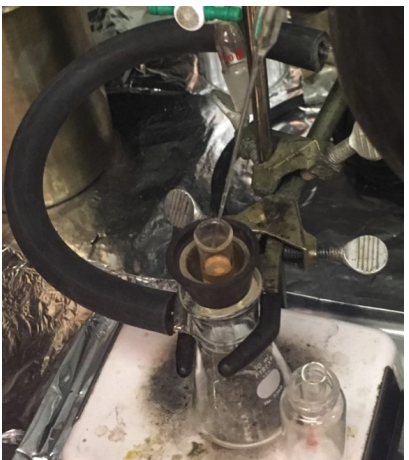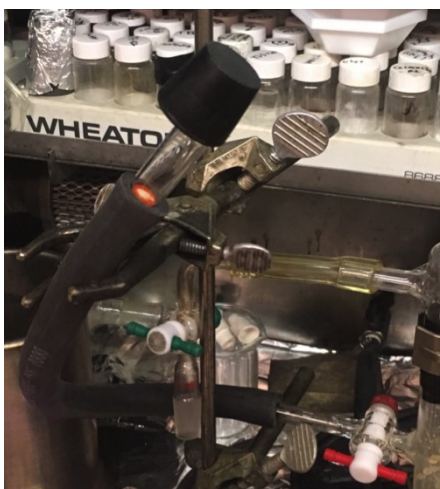

**Figures S19-S20.**

Suspending the red crystals of **1** in several portions of pentane, the crystals were transferred to a (pre-weighted) small filter. The crystals were washed with 4 x 3 mL of pentane.

Crystals of **1** were dried on vacuum for 30 min directly on the filter.

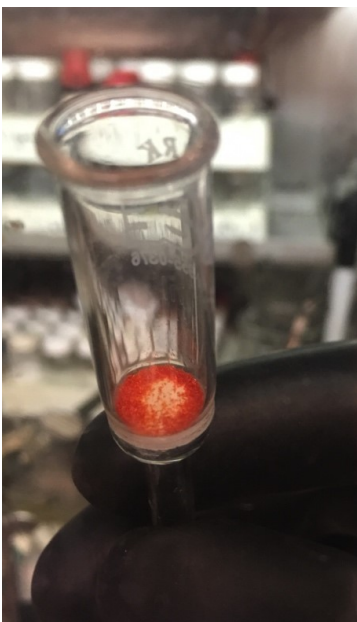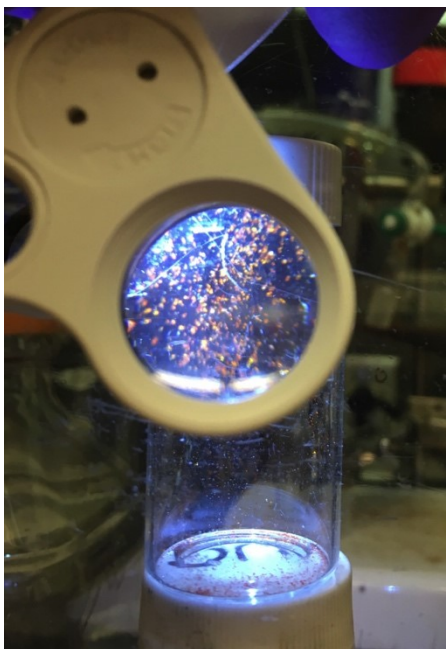

**Figure S21.**

8.2 mg (6.4  $\mu\text{mol}$ , MW = 1271.50  $\text{g}\cdot\text{mol}^{-1}$ ) of crystalline **1** were collected (90 % yield).

Notes: If crystals are too small, the overall amount of hexanes can be increased to 4 mL and the reaction times extended to 6 hours for the crystals seeding and overnight refrigeration for the crystals growing. If powdered material is obtained, a more careful layering can be applied, by introducing a “buffer” layer of hexane between the two solutions. Alternatively, the layering can be facilitated in a NMR tube.

Photographs of americium hydroxylaminate complex synthesis, 3

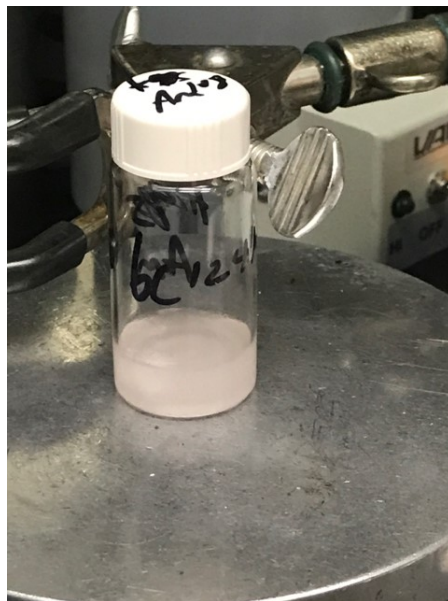

**Figure S22.** Putative 'AmCl<sub>3</sub>' residue (from an aqueous 6 M HCl stock solution that was blown to dryness and pumped *in vacuo* into a helium atmosphere drybox) suspended in DME and treated with TMS-Cl to remove scavenger residual water content.

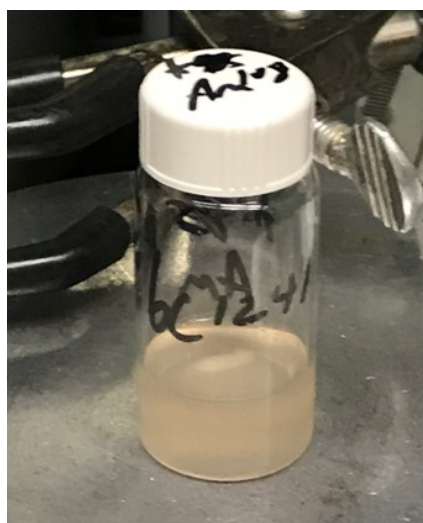

**Figure S23.** Following addition of K[N(SiMe<sub>3</sub>)<sub>2</sub>] and stirring at ambient temperature overnight – a distinct color change from pale pink to peach is observed.

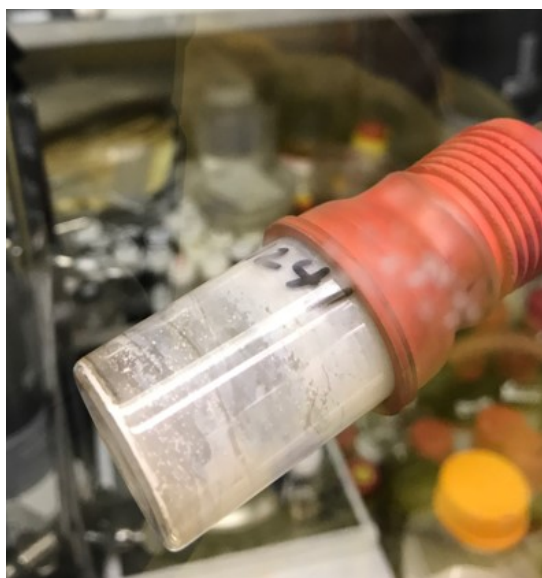

**Figure S24.** Reaction mixture, presumed to contain the intended  $\text{Am}[\text{N}(\text{SiMe}_3)_2]_3$  intermediate, with volatiles removed *in vacuo*.

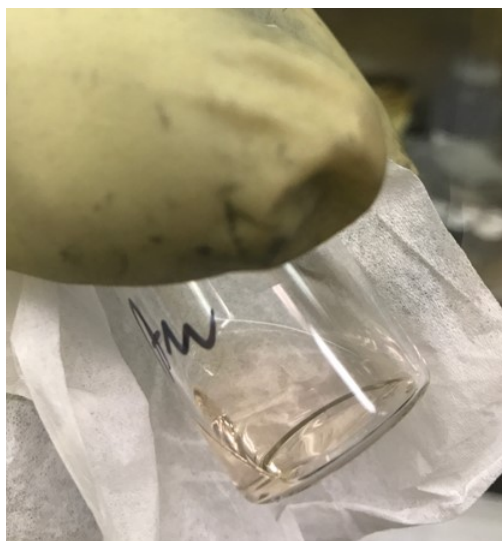

**Figure S25.** The putative  $\text{Am}[\text{N}(\text{SiMe}_3)_2]_3$  intermediate extracted into hexanes, after filtration. This is good indicator that the reaction proceeded as planned because ‘ $\text{AmCl}_3(\text{DME})_x$ ’ would not be expected to exhibit appreciable solubility in hexanes.



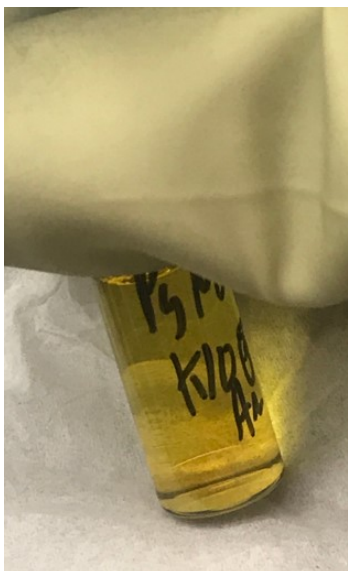

**Figure S26.** Reaction solution immediately after filtration of 2-(<sup>t</sup>BuNOH)py in Et<sub>2</sub>O onto a solution of the Am[N(SiMe<sub>3</sub>)<sub>2</sub>]<sub>3</sub> intermediate in Et<sub>2</sub>O – the color change to yellow is very apparent.

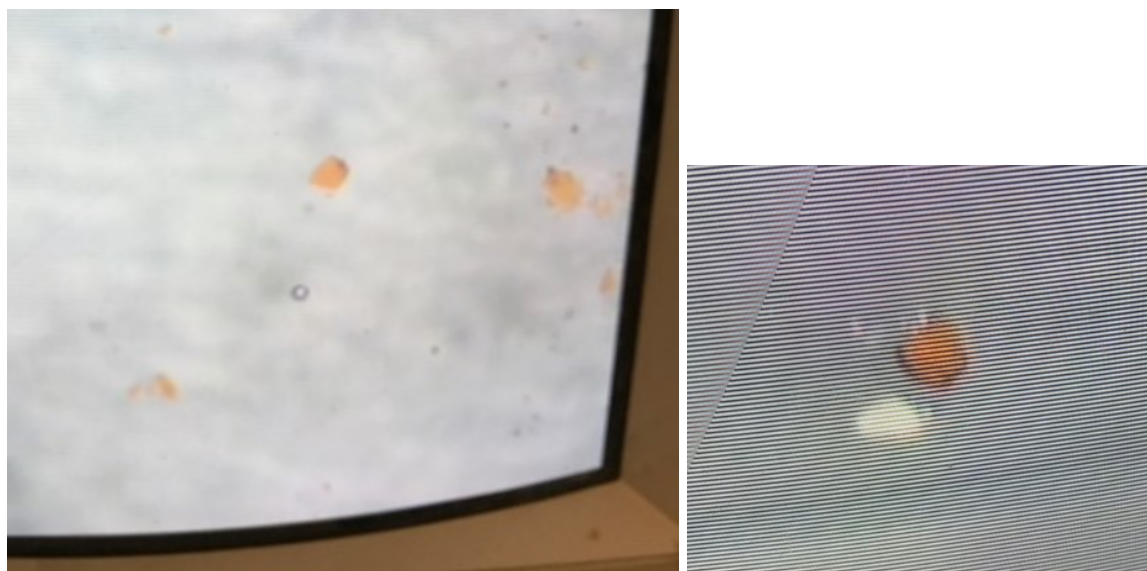

**Figure S27.** Small orange-yellow (amber) crystals that deposited from the solution, and were used for X-ray diffraction structural determination.



## Crystallographic Data

**Table S1.** Crystallographic Data for **1** and **3**.

| <b>Compound</b>                                                        | <b>1</b>                                                         | <b>3</b>                                                                       |
|------------------------------------------------------------------------|------------------------------------------------------------------|--------------------------------------------------------------------------------|
| <b>Empirical Formula</b>                                               | C <sub>36</sub> H <sub>52</sub> N <sub>8</sub> O <sub>4</sub> Pu | C <sub>54</sub> H <sub>78</sub> Am <sub>2</sub> N <sub>12</sub> O <sub>6</sub> |
| <b>Formula Weight</b>                                                  | 899.86                                                           | 1477.40                                                                        |
| <b>Temperature (K)</b>                                                 | 100(1)                                                           | 100(1)                                                                         |
| <b>Crystal System</b>                                                  | Monoclinic                                                       | Monoclinic                                                                     |
| <b>Space Group</b>                                                     | <i>I2/c</i>                                                      | <i>P2<sub>1</sub>/n</i>                                                        |
| <b><i>a</i> (Å)</b>                                                    | 17.550(4)                                                        | 12.9096(17)                                                                    |
| <b><i>b</i> (Å)</b>                                                    | 10.078(2)                                                        | 16.627(2)                                                                      |
| <b><i>c</i> (Å)</b>                                                    | 21.290(5)                                                        | 13.5557(18)                                                                    |
| <b><math>\alpha</math> (deg)</b>                                       | 90                                                               | 90                                                                             |
| <b><math>\beta</math> (deg)</b>                                        | 98.496(16)                                                       | 101.1463(16)                                                                   |
| <b><math>\gamma</math> (deg)</b>                                       | 90                                                               | 90                                                                             |
| <b>Volume (Å<sup>3</sup>)</b>                                          | 3724.2(14)                                                       | 2854.8(7)                                                                      |
| <b>Z</b>                                                               | 4                                                                | 2                                                                              |
| <b><math>\rho_{\text{calcd}}</math> (Mg/m<sup>3</sup>)</b>             | 1.610                                                            | 1.714                                                                          |
| <b><math>\mu</math> (mm<sup>-1</sup>)</b>                              | 1.819                                                            | 2.725                                                                          |
| <b>R1<sup>a</sup> (<i>I</i> &gt; 2.0<math>\sigma</math>(<i>I</i>))</b> | 0.0344                                                           | 0.0324                                                                         |
| <b>wR2 (<i>I</i> &gt; 2<math>\sigma</math>(<i>I</i>))</b>              | 0.0709                                                           | 0.0611                                                                         |

<sup>a</sup> Definitions:  $R1 = \sum ||F_o| - |F_c|| / \sum |F_o|$ ,  $wR2 = [\sum w(F_o^2 - F_c^2)^2 / \sum w(F_o^2)^2]^{1/2}$ .

## NMR spectra

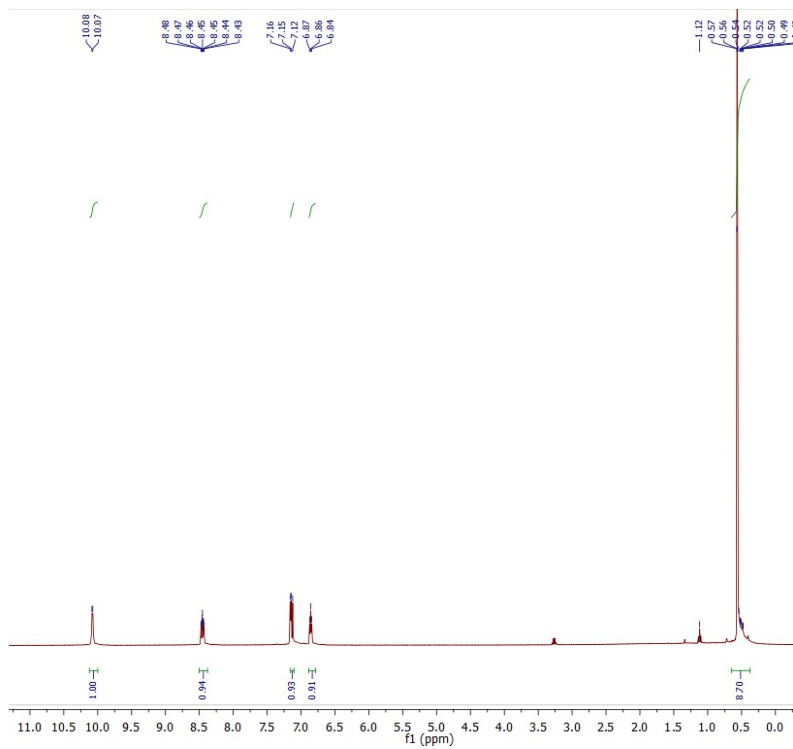

**Figure S28.**  $^1\text{H}$  NMR spectra of **1** in  $\text{C}_6\text{D}_6$  solution.

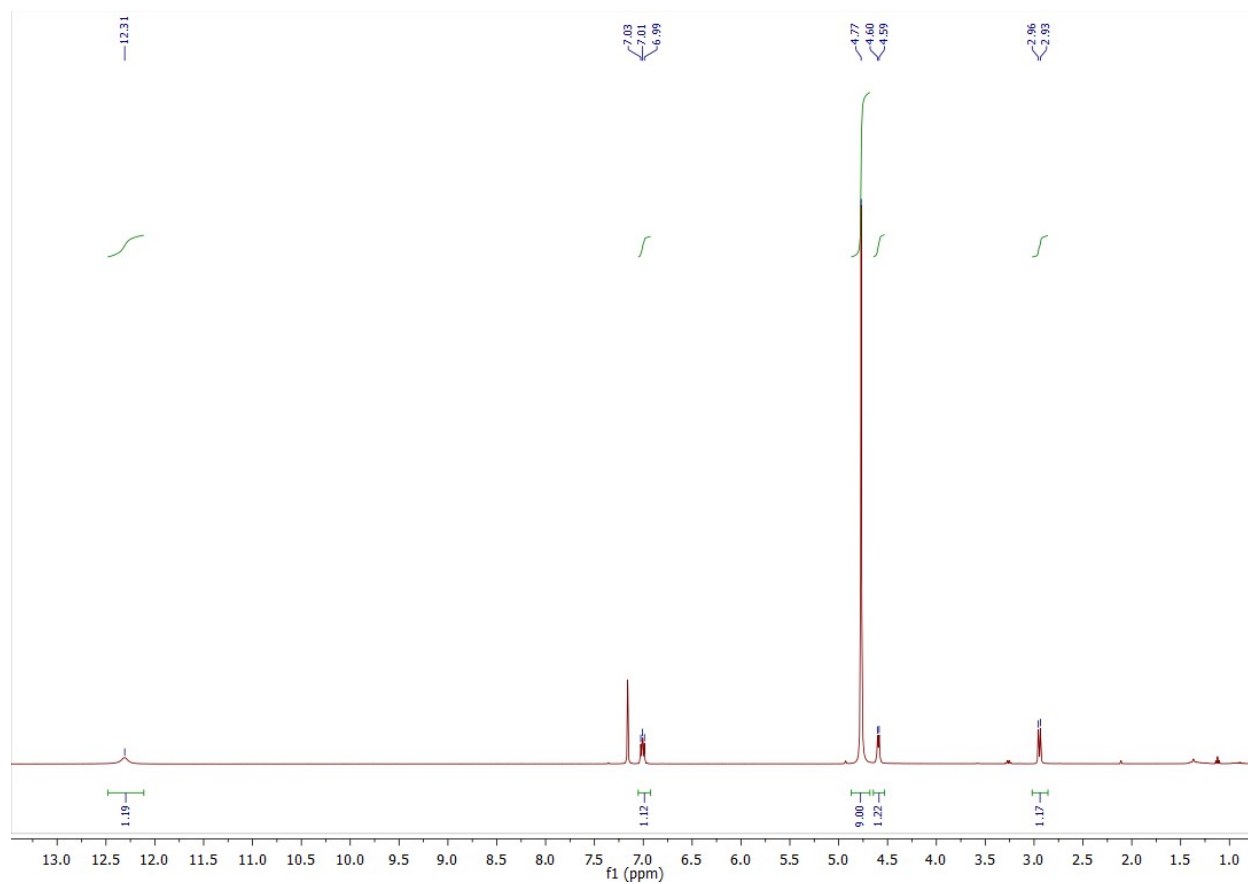

**Figure S29.** <sup>1</sup>H NMR spectra of **2** in C<sub>6</sub>D<sub>6</sub> solution.

UV-Vis-NIR spectra

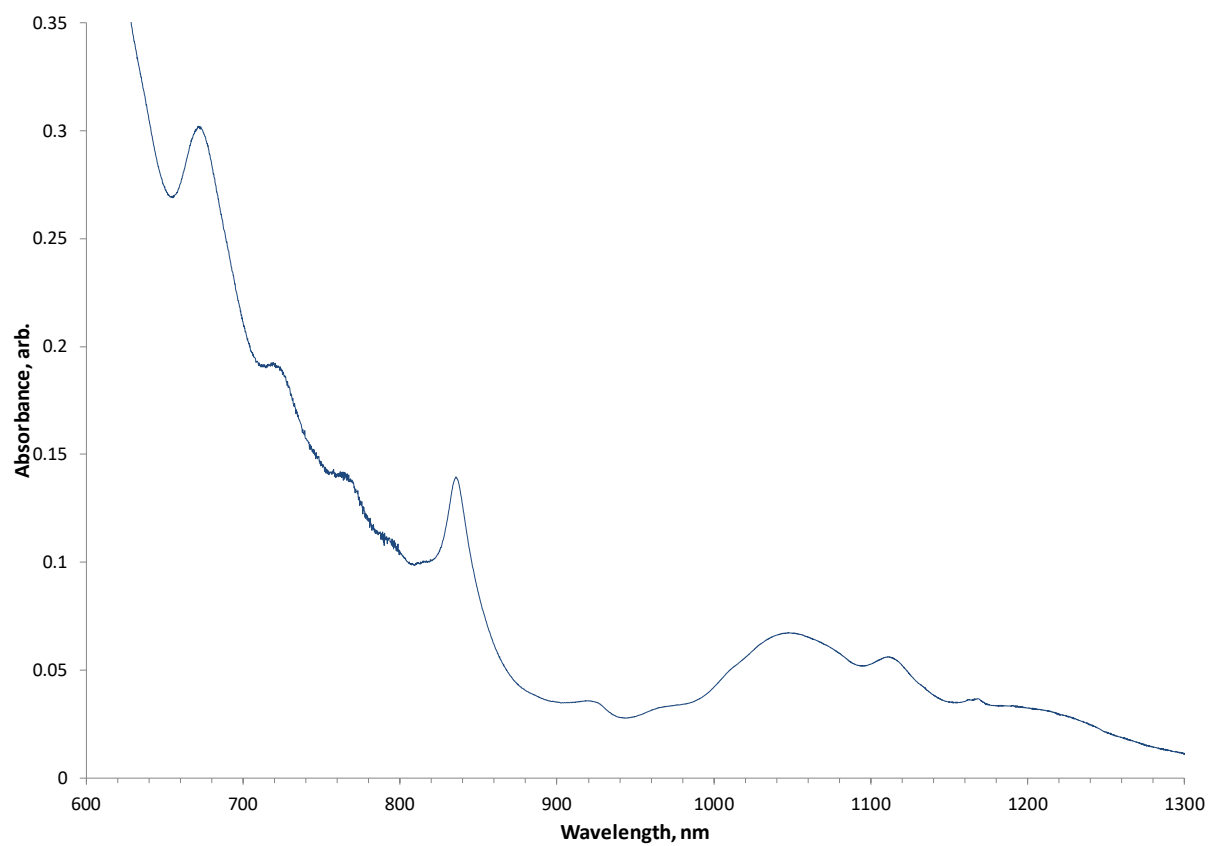

**Figure S30.** Vis-NIR spectrum of **1** dissolved in THF.

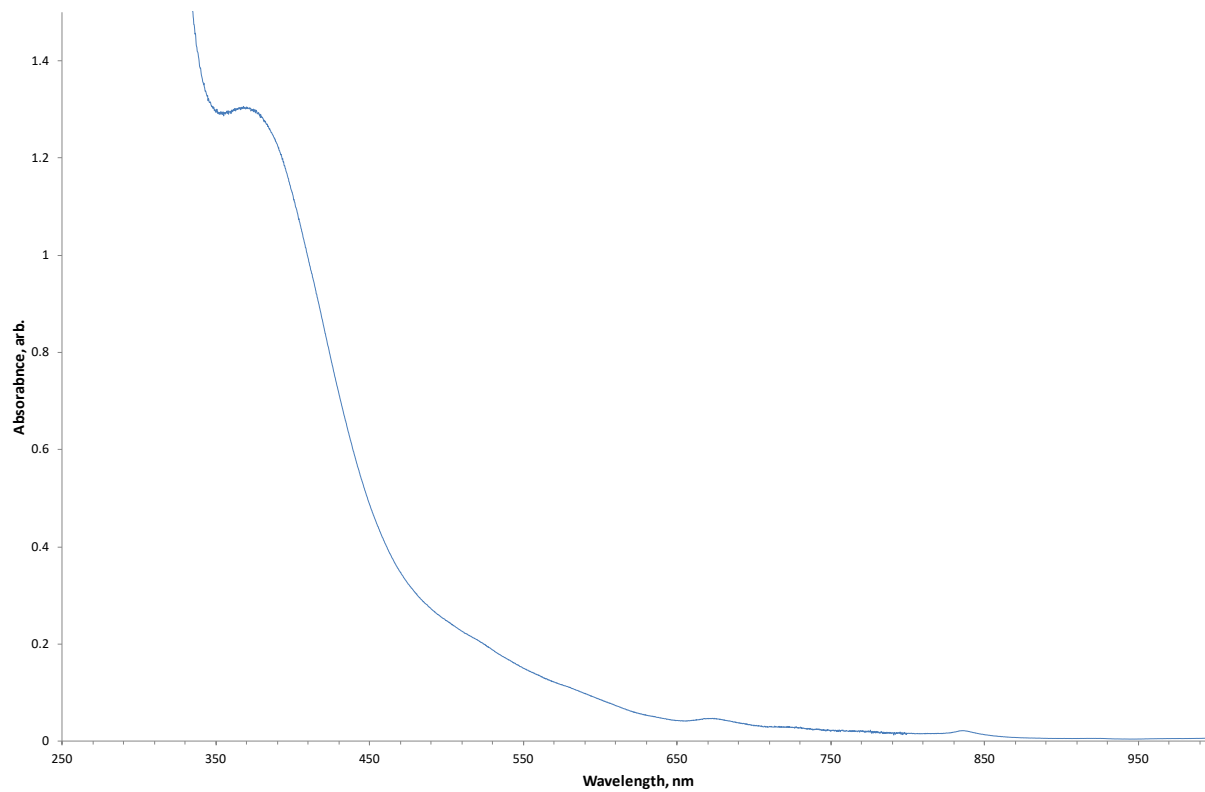

**Figure S31.** UV-Vis-NIR spectrum of **1** dissolved in THF, diluted to observe maxima of intense band in the UV region.



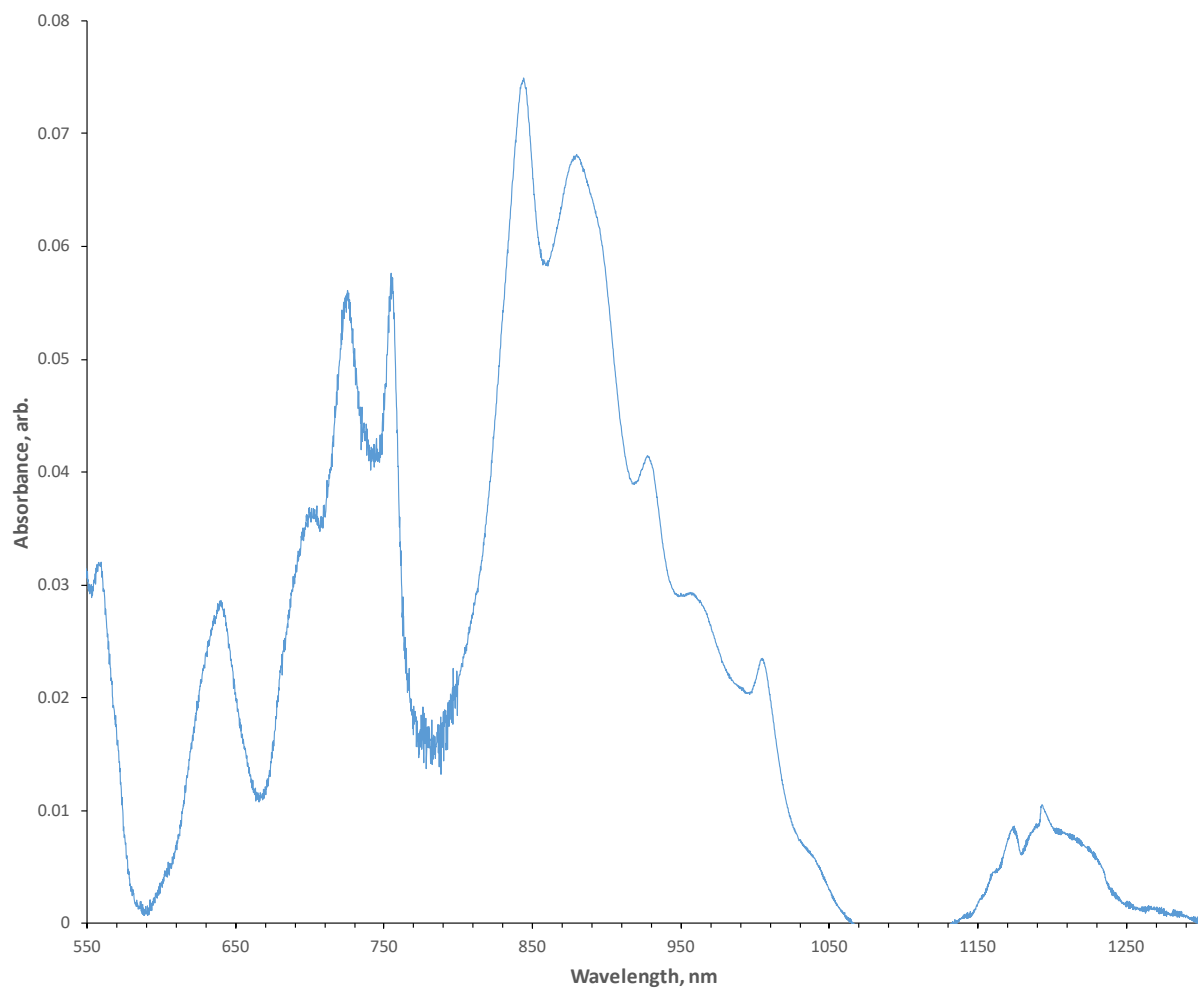

**Figure S32** Vis-NIR spectrum of **2** dissolved in THF.

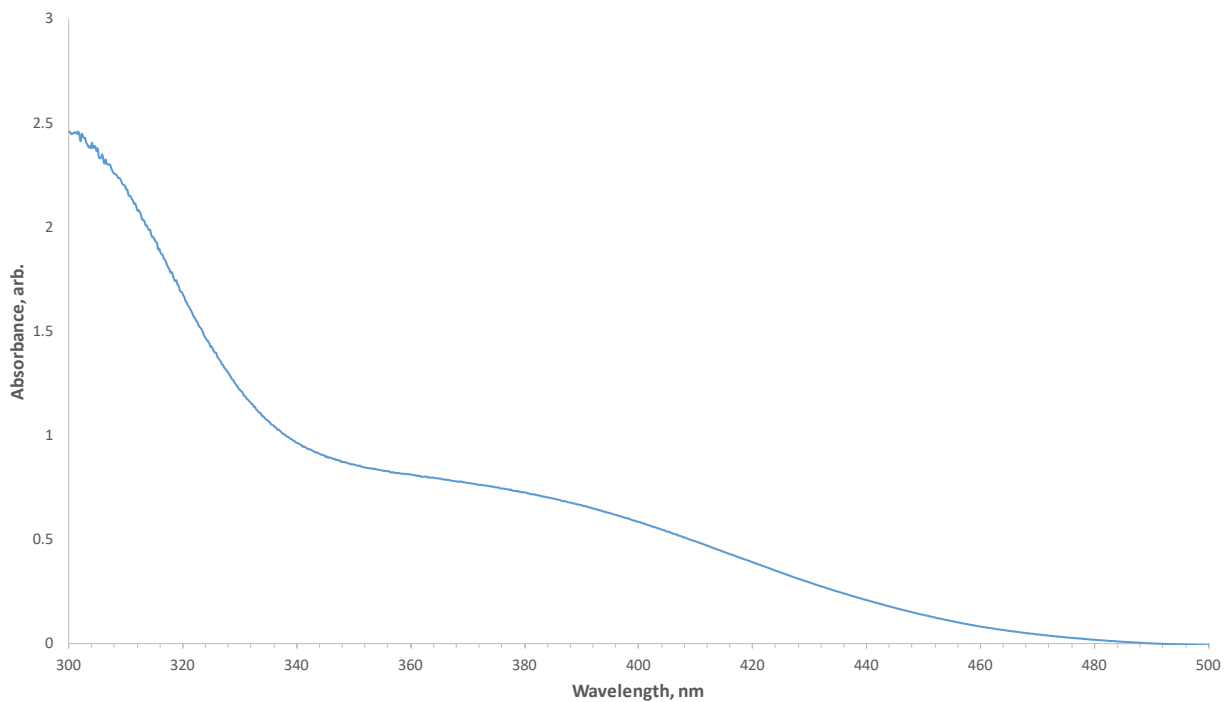

**Figure S33.** UV-Vis-NIR spectrum of **2** dissolved in THF, diluted to observe maxima of intense band in the UV region.

### Additional computational data

**Table S2.** Experimental and optimized average An–O, An–N and An–C distances in Å for An[(<sup>t</sup>BuNO)py]<sub>4</sub><sup>0/−</sup> (An=Np, Pu). The N1, N2, and C1/C2 atoms correspond to those shown in the illustration below.

|                   | An-O  |          |          | An-N1 |          |           | An-N2 |          |         | An-C1/C2 |           |         |
|-------------------|-------|----------|----------|-------|----------|-----------|-------|----------|---------|----------|-----------|---------|
|                   | Calc. | XRD      | EXAFS    | Calc. | XRD      | EXAFS     | Calc. | XRD      | EXAFS   | Calc.    | XRD       | EXAFS   |
| Pu <sup>IV</sup>  | 2.296 | 2.231(4) | 2.239(4) | 2.546 | 2.500(2) | 2.496(5)  | 3.313 | 3.253(4) | 3.29(2) | 3.430    | 3.370(4)  | 3.41(3) |
|                   |       |          |          |       |          |           |       |          |         | /3.450   | /3.436(4) |         |
| Np <sup>IV</sup>  | 2.245 |          | 2.245(9) | 2.576 |          | 2.528(14) | 3.297 |          | 3.30(3) | 3.436    |           | 3.45(3) |
|                   |       |          |          |       |          |           |       |          |         | /3.499   |           |         |
| Pu <sup>III</sup> | 2.384 |          |          | 2.557 |          |           | 3.365 |          |         | 3.445    |           |         |
|                   |       |          |          |       |          |           |       |          |         | /3.464   |           |         |
| Np <sup>III</sup> | 2.356 |          |          | 2.558 |          |           | 3.355 |          |         | 3.453    |           |         |
|                   |       |          |          |       |          |           |       |          |         | /3.462   |           |         |

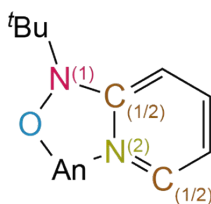

An illustration showing how the nomenclature in Table S2 (regarding N1, N2, and C1/C2) correspond with atoms associated with structures from **1** and **2**.

**Table S3.** Optimized Am–O and Am–N bond lengths in Å of Am[(<sup>t</sup>BuNO)py]<sub>4</sub> and [Am<sup>III</sup>(μ<sub>2</sub>-(<sup>t</sup>BuNO)py)(2-(<sup>t</sup>BuNO)py)<sub>2</sub>]<sub>2</sub>, and comparison with experimental values.

|                                                                                                                   | Terminal An-O |       | Bridging An-O |       | Terminal An-N |       | Bridging An-N <sup>a</sup> |       |
|-------------------------------------------------------------------------------------------------------------------|---------------|-------|---------------|-------|---------------|-------|----------------------------|-------|
|                                                                                                                   | Calc.         | Expt. | Calc.         | Expt. | Calc.         | Expt. | Calc.                      | Expt. |
| Am[( <sup>t</sup> BuNO)py] <sub>4</sub> <sup>−</sup>                                                              | 2.393         |       |               |       | 2.590         |       |                            |       |
| [Am <sup>III</sup> (μ <sub>2</sub> -( <sup>t</sup> BuNO)py)(2-( <sup>t</sup> BuNO)py) <sub>2</sub> ] <sub>2</sub> | 2.329         | 2.297 | 2.430         | 2.416 | 2.544         | 2.549 | 2.673                      | 2.634 |
|                                                                                                                   |               |       |               |       |               |       | 2.805                      | 2.641 |

<sup>a</sup> The shorter and longer bridging An–N distances represent for the Am–N<sub>(py)</sub> and Am–N<sub>(tBu)</sub> modes, respectively.

**Table S4.** Optimized An–O and An–N bond lengths in Å of Np[(<sup>t</sup>BuNO)py]<sub>4</sub><sup>+0/-</sup>, Pu[(<sup>t</sup>BuNO)py]<sub>4</sub><sup>+0/-</sup>, Am[(<sup>t</sup>BuNO)py]<sub>4</sub><sup>0/-</sup>, and [Am<sup>III</sup>(μ<sub>2</sub>-(<sup>t</sup>BuNO)py)(2-(<sup>t</sup>BuNO)py)<sub>2</sub>]<sub>2</sub> complexes. The average values are in parentheses.

| An                                                                                                | An-O                               | An-N                               |
|---------------------------------------------------------------------------------------------------|------------------------------------|------------------------------------|
| An[( <sup>t</sup> BuNO)py] <sub>4</sub> <sup>+</sup>                                              |                                    |                                    |
| Np                                                                                                | 2.191, 2.191, 2.191, 2.191 (2.191) | 2.553, 2.553, 2.553, 2.553 (2.553) |
| Pu                                                                                                | 2.196, 2.196, 2.293, 2.293 (2.245) | 2.543, 2.543, 2.568, 2.568 (2.556) |
| An[( <sup>t</sup> BuNO)py] <sub>4</sub>                                                           |                                    |                                    |
| Np                                                                                                | 2.245, 2.245, 2.245, 2.245 (2.245) | 2.576, 2.576, 2.576, 2.576 (2.576) |
| Pu                                                                                                | 2.296, 2.296, 2.296, 2.296 (2.296) | 2.546, 2.546, 2.546, 2.546 (2.546) |
| Am                                                                                                | 2.327, 2.327, 2.327, 2.327 (2.327) | 2.581, 2.581, 2.581, 2.581 (2.581) |
| An[( <sup>t</sup> BuNO)py] <sub>4</sub> <sup>-</sup>                                              |                                    |                                    |
| Np                                                                                                | 2.356, 2.356, 2.356, 2.356 (2.356) | 2.558, 2.558, 2.558, 2.558 (2.558) |
| Pu                                                                                                | 2.384, 2.384, 2.385, 2.385 (2.384) | 2.557, 2.557, 2.557, 2.557 (2.557) |
| Am                                                                                                | 2.393, 2.393, 2.393, 2.393 (2.393) | 2.590, 2.590, 2.590, 2.590 (2.590) |
| [An(μ <sub>2</sub> -( <sup>t</sup> BuNO)py)(2-( <sup>t</sup> BuNO)py) <sub>2</sub> ] <sub>2</sub> |                                    |                                    |
| Am                                                                                                | 2.299, 2.359, 2.409, 2.452         | 2.529, 2.558, 2.673, 2.805         |
|                                                                                                   | 2.299, 2.359, 2.409, 2.451         | 2.529, 2.558, 2.673, 2.805         |

**Table S5.** Calculated absolute redox potentials in V of the redox couples in THF at the scalar relativistic level ( $E_{\text{SR}}$ ) and at the spin-orbit relativistic level ( $E_{\text{so}}$ ), respectively, and spin-orbit coupling correction ( $\Delta E_{\text{SO}}=E_{\text{SO}}-E_{\text{SR}}$ ). The  $E_{\text{SR}}$  for  $\text{Fc}^+ \rightarrow \text{Fc}^0$  is calculated to be  $-5.436$  V, and SO correction is neglected for these light transition metal compounds.<sup>a</sup>

|                                                                                               | $E_{\text{SR}}$ (V) | $E_{\text{so}}$ (V) | $\Delta E_{\text{SO}}$ (V) |
|-----------------------------------------------------------------------------------------------|---------------------|---------------------|----------------------------|
| $\text{Np}[(^t\text{BuNO})\text{py}]_4^0 \rightarrow \text{Np}[(^t\text{BuNO})\text{py}]_4^-$ | -2.217              | -2.151              | 0.056                      |
| $\text{Pu}[(^t\text{BuNO})\text{py}]_4^0 \rightarrow \text{Pu}[(^t\text{BuNO})\text{py}]_4^-$ | -2.936              | -2.755              | 0.181                      |
| $\text{Am}[(^t\text{BuNO})\text{py}]_4^0 \rightarrow \text{Am}[(^t\text{BuNO})\text{py}]_4^-$ | -3.559              | -                   | -                          |
| $\text{Np}[(^t\text{BuNO})\text{py}]_4^+ \rightarrow \text{Np}[(^t\text{BuNO})\text{py}]_4^0$ | -4.749              | -                   | -                          |
| $\text{Pu}[(^t\text{BuNO})\text{py}]_4^+ \rightarrow \text{Pu}[(^t\text{BuNO})\text{py}]_4^0$ | -4.701              | -                   | -                          |

<sup>a</sup> SO correction is neglected for  $\text{Am}[(^t\text{BuNO})\text{py}]_4^0 \rightarrow \text{Am}[(^t\text{BuNO})\text{py}]_4^-$  and  $\text{An}[(^t\text{BuNO})\text{py}]_4^+ \rightarrow \text{An}[(^t\text{BuNO})\text{py}]_4^0$  ( $\text{An}=\text{Np}, \text{Pu}$ ), because the electron is removed from ligand without change on the oxidation state of An center in the reduction reaction.



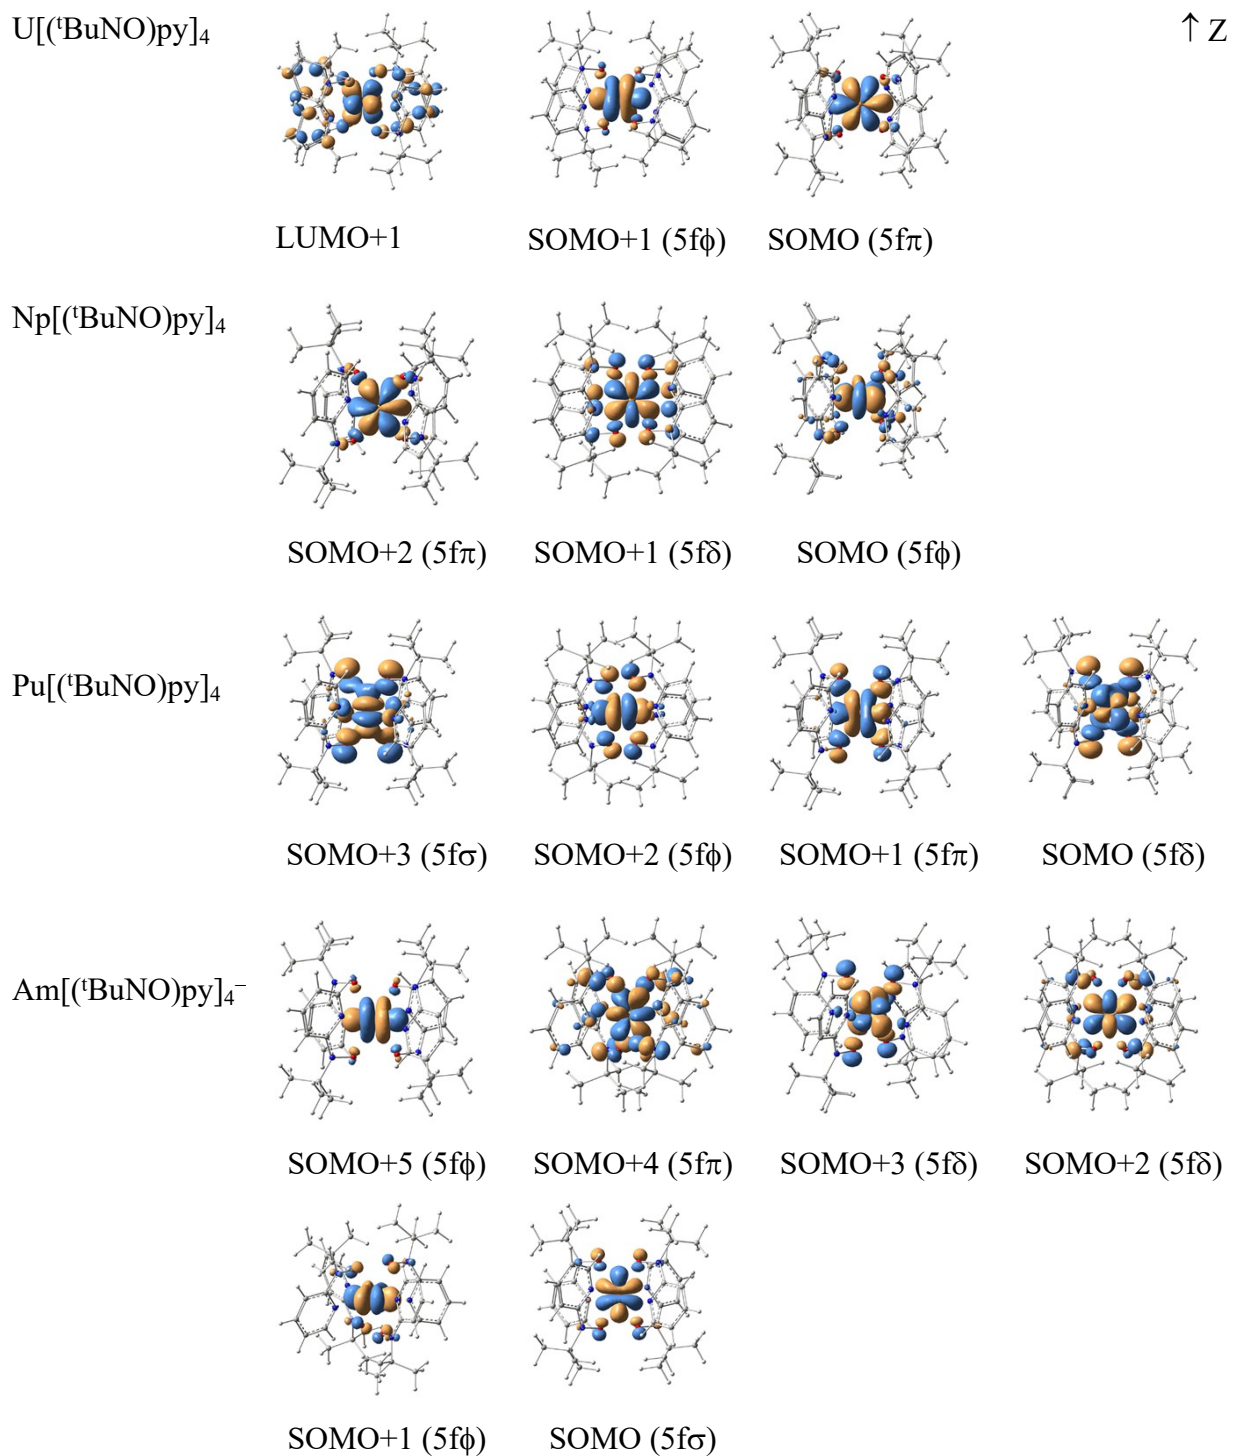

**Figure S34.** SOMOs in  $An[(^t\text{BuNO})\text{py}]_4$  ( $An=U, Np, Pu$ ) and  $Am[(^t\text{BuNO})\text{py}]_4^-$  complexes and LUMO+1 in  $U[(^t\text{BuNO})\text{py}]_4$  with dominant 5f character in parentheses. The Z direction is labeled with an arrow.

**Table S6.** Cartesian coordinates (in Å) of optimized geometries of  $\text{Np}[(^t\text{BuNO})\text{py}]_4^{+0/-}$ ,  $\text{Pu}[(^t\text{BuNO})\text{py}]_4^{+0/-}$ ,  $\text{Am}[(^t\text{BuNO})\text{py}]_4^{0/-}$ , and  $[\text{Am}^{\text{III}}(\mu_2\text{-}(^t\text{BuNO})\text{py})(2\text{-}(^t\text{BuNO})\text{py})_2]_2$  complexes.

| $\text{Np}[(^t\text{BuNO})\text{py}]_4^-$ |             |             |             | $\text{Np}[(^t\text{BuNO})\text{py}]_4^0$ |             |             |             |
|-------------------------------------------|-------------|-------------|-------------|-------------------------------------------|-------------|-------------|-------------|
| O                                         | 0.81639100  | 1.09003500  | 1.92226200  | O                                         | 0.86214600  | 1.24288800  | 1.65891100  |
| O                                         | 0.81835300  | -1.08843300 | -1.92221800 | O                                         | 0.86423100  | -1.24144600 | -1.65899400 |
| O                                         | -0.81636800 | -1.09001400 | 1.92227500  | O                                         | -0.86214400 | -1.24289000 | 1.65891000  |
| O                                         | -0.81834700 | 1.08843800  | -1.92221700 | O                                         | -0.86423000 | 1.24144700  | -1.65899200 |
| N                                         | 1.79606400  | 2.04204800  | 1.96490200  | N                                         | 2.01198900  | 1.98901500  | 1.69338700  |
| N                                         | 1.93449600  | 1.64791700  | -0.29078900 | N                                         | 2.04775800  | 1.46597000  | -0.54364600 |
| N                                         | 1.79966400  | -2.03875000 | -1.96493500 | N                                         | 2.01528500  | -1.98571500 | -1.69343200 |
| N                                         | 1.93675700  | -1.64525100 | 0.29094600  | N                                         | 2.05004900  | -1.46271800 | 0.54363300  |
| N                                         | -1.79603800 | -2.04202900 | 1.96492300  | N                                         | -2.01198800 | -1.98901500 | 1.69338600  |
| N                                         | -1.93447700 | -1.64791200 | -0.29077100 | N                                         | -2.04775600 | -1.46596900 | -0.54364700 |
| N                                         | -1.79966300 | 2.03875000  | -1.96493400 | N                                         | -2.01528500 | 1.98571400  | -1.69343100 |
| N                                         | -1.93674300 | 1.64526300  | 0.29095000  | N                                         | -2.05004700 | 1.46271700  | 0.54363400  |
| C                                         | 2.42494600  | 2.33919500  | 0.79660300  | C                                         | 2.61807900  | 2.17168300  | 0.48445700  |
| C                                         | 2.48080800  | 1.87111500  | -1.50643100 | C                                         | 2.57718400  | 1.56066800  | -1.77996000 |
| C                                         | 3.51871600  | 2.76359800  | -1.74686400 | C                                         | 3.67729600  | 2.34699500  | -2.09537800 |
| C                                         | 4.03361300  | 3.46884400  | -0.63849800 | C                                         | 4.26695700  | 3.07795900  | -1.04583100 |
| C                                         | 3.50169000  | 3.26490200  | 0.62666900  | C                                         | 3.75323500  | 3.00089900  | 0.23719100  |
| C                                         | 2.06053200  | 2.64648700  | 3.30551600  | C                                         | 2.26869600  | 2.73914500  | 2.96627900  |
| C                                         | 3.48597300  | 2.29025400  | 3.78180000  | C                                         | 3.68999900  | 2.43152800  | 3.48166700  |
| C                                         | 1.82289500  | 4.17196100  | 3.26778300  | C                                         | 2.03685700  | 4.24996800  | 2.75751800  |
| C                                         | 1.06082600  | 2.04569200  | 4.30828000  | C                                         | 1.27022800  | 2.24101300  | 4.02461700  |
| C                                         | 2.42859500  | -2.33539700 | -0.79653500 | C                                         | 2.62156000  | -2.16748500 | -0.48445600 |
| C                                         | 2.48305400  | -1.86802300 | 1.50667300  | C                                         | 2.57952700  | -1.55663500 | 1.77998400  |
| C                                         | 3.52225100  | -2.75900300 | 1.74710900  | C                                         | 3.68084900  | -2.34124600 | 2.09545400  |
| C                                         | 4.03852100  | -3.46312300 | 0.63866300  | C                                         | 4.27174100  | -3.07123600 | 1.04592100  |
| C                                         | 3.50665600  | -3.25956600 | -0.62659000 | C                                         | 3.75799900  | -2.99492500 | -0.23713800 |
| C                                         | 2.06534200  | -2.64246600 | -3.30563900 | C                                         | 2.27321800  | -2.73545500 | -2.96630800 |
| C                                         | 1.06518400  | -2.04269600 | -4.30856700 | C                                         | 1.27404700  | -2.23885700 | -4.02470600 |
| C                                         | 1.82970900  | -4.16826400 | -3.26839900 | C                                         | 2.04369500  | -4.24663200 | -2.75755800 |
| C                                         | 3.49046700  | -2.28423500 | -3.78136200 | C                                         | 3.69407500  | -2.42565000 | -3.48161400 |
| C                                         | -2.42492000 | -2.33918300 | 0.79662700  | C                                         | -2.61807800 | -2.17168200 | 0.48445600  |
| C                                         | -2.48079700 | -1.87112200 | -1.50640700 | C                                         | -2.57718200 | -1.56066800 | -1.77996100 |
| C                                         | -3.51870600 | -2.76360900 | -1.74682200 | C                                         | -3.67729500 | -2.34699400 | -2.09538000 |
| C                                         | -4.03359500 | -3.46884700 | -0.63844600 | C                                         | -4.26695600 | -3.07795800 | -1.04583200 |
| C                                         | -3.50166200 | -3.26489200 | 0.62671500  | C                                         | -3.75323500 | -3.00089800 | 0.23719000  |
| C                                         | -2.06052600 | -2.64648300 | 3.30552800  | C                                         | -2.26869700 | -2.73914300 | 2.96627900  |
| C                                         | -3.48599400 | -2.29028400 | 3.78175300  | C                                         | -3.68999900 | -2.43152100 | 3.48166800  |
| C                                         | -1.82288700 | -4.17195400 | 3.26776400  | C                                         | -2.03686400 | -4.24996700 | 2.75751800  |
| C                                         | -1.06086700 | -2.04570500 | 4.30835300  | C                                         | -1.27022500 | -2.24101600 | 4.02461500  |

|   |             |             |             |   |             |             |             |
|---|-------------|-------------|-------------|---|-------------|-------------|-------------|
| C | -2.42858700 | 2.33540200  | -0.79653200 | C | -2.62156000 | 2.16748400  | -0.48445500 |
| C | -2.48303000 | 1.86804400  | 1.50667900  | C | -2.57952500 | 1.55663500  | 1.77998500  |
| C | -3.52222300 | 2.75902800  | 1.74711600  | C | -3.68084700 | 2.34124500  | 2.09545600  |
| C | -4.03849700 | 3.46314500  | 0.63867000  | C | -4.27174000 | 3.07123500  | 1.04592300  |
| C | -3.50664100 | 3.25957900  | -0.62658500 | C | -3.75799900 | 2.99492300  | -0.23713600 |
| C | -2.06535200 | 2.64246100  | -3.30563800 | C | -2.27321900 | 2.73545300  | -2.96630700 |
| C | -1.06515100 | 2.04274900  | -4.30855800 | C | -1.27404300 | 2.23886100  | -4.02470300 |
| C | -1.82979800 | 4.16827000  | -3.26837900 | C | -2.04370400 | 4.24663100  | -2.75755600 |
| C | -3.49045400 | 2.28416400  | -3.78138300 | C | -3.69407300 | 2.42564100  | -3.48161700 |
| H | 2.03199400  | 1.27572400  | -2.30854200 | H | 2.06507700  | 0.95958400  | -2.53727300 |
| H | 3.91713400  | 2.89853100  | -2.75521500 | H | 4.06033400  | 2.39009300  | -3.11644300 |
| H | 4.85942000  | 4.17763800  | -0.76297600 | H | 5.13558500  | 3.71596300  | -1.23451100 |
| H | 3.92086400  | 3.80732600  | 1.47254100  | H | 4.21898100  | 3.57456900  | 1.03520900  |
| H | 3.60233800  | 1.19619800  | 3.81302400  | H | 3.81252400  | 1.34766700  | 3.62636700  |
| H | 3.66214900  | 2.68621700  | 4.79624100  | H | 3.84902500  | 2.92855600  | 4.45164600  |
| H | 4.27102600  | 2.68692100  | 3.12388900  | H | 4.48685700  | 2.76658400  | 2.80554800  |
| H | 2.48804800  | 4.69817400  | 2.57070300  | H | 2.72136800  | 4.69219800  | 2.02077600  |
| H | 1.97414700  | 4.60464900  | 4.27107800  | H | 2.17400300  | 4.78974900  | 3.70799000  |
| H | 0.78715000  | 4.37589500  | 2.95692700  | H | 1.00798200  | 4.42591600  | 2.40919900  |
| H | 0.02617900  | 2.26384400  | 4.01489100  | H | 0.23387100  | 2.44352100  | 3.72797600  |
| H | 1.25621100  | 2.48723100  | 5.30028300  | H | 1.47898200  | 2.76541800  | 4.97023900  |
| H | 1.16070700  | 0.95532600  | 4.37015100  | H | 1.36701800  | 1.16024200  | 4.19517900  |
| H | 2.03309600  | -1.27360500 | 2.30886400  | H | 2.06641300  | -0.95639700 | 2.53728600  |
| H | 3.92058700  | -2.89366000 | 2.75552900  | H | 4.06387300  | -2.38378700 | 3.11654700  |
| H | 4.86533600  | -4.17073800 | 0.76315400  | H | 5.14135600  | -3.70788300 | 1.23464200  |
| H | 3.92685200  | -3.80112000 | -1.47251400 | H | 4.22470800  | -3.56782300 | -1.03514700 |
| H | 0.03072500  | -2.26225400 | -4.01557200 | H | 0.23798400  | -2.44294700 | -3.72812600 |
| H | 1.26147100  | -2.48370800 | -5.30062600 | H | 1.48365900  | -2.76294400 | -4.97031500 |
| H | 1.16366600  | -0.95218300 | -4.37011900 | H | 1.36919500  | -1.15794000 | -4.19526900 |
| H | 2.49533800  | -4.69377100 | -2.57123800 | H | 2.72886500  | -4.68781200 | -2.02079700 |
| H | 1.98185800  | -4.60048900 | -4.27175800 | H | 2.18170100  | -4.78619900 | -3.70802700 |
| H | 0.79413500  | -4.37365100 | -2.95792900 | H | 1.01508000  | -4.42416400 | -2.40927300 |
| H | 3.60542000  | -1.19001900 | -3.81223600 | H | 3.81495000  | -1.34159700 | -3.62626800 |
| H | 3.66747200  | -2.67967700 | -4.79586100 | H | 3.85390500  | -2.92239700 | -4.45160500 |
| H | 4.27583500  | -2.68006500 | -3.12332500 | H | 4.49141300  | -2.75951600 | -2.80547300 |
| H | -2.03199100 | -1.27573700 | -2.30852700 | H | -2.06507500 | -0.95958400 | -2.53727400 |
| H | -3.91713200 | -2.89855200 | -2.75516900 | H | -4.06033200 | -2.39009100 | -3.11644500 |
| H | -4.85940200 | -4.17764300 | -0.76291100 | H | -5.13558500 | -3.71596100 | -1.23451300 |
| H | -3.92082600 | -3.80730600 | 1.47260000  | H | -4.21898100 | -3.57456800 | 1.03520800  |
| H | -3.60238100 | -1.19623000 | 3.81299100  | H | -3.81251800 | -1.34765900 | 3.62636800  |
| H | -3.66220900 | -2.68626900 | 4.79617800  | H | -3.84902500 | -2.92854800 | 4.45164800  |
| H | -4.27100700 | -2.68695600 | 3.12379600  | H | -4.48685900 | -2.76657400 | 2.80555100  |
| H | -2.48802100 | -4.69814700 | 2.57065000  | H | -2.72137800 | -4.69219600 | 2.02077700  |
| H | -1.97417000 | -4.60466700 | 4.27104300  | H | -2.17401000 | -4.78974800 | 3.70799000  |
| H | -0.78713300 | -4.37587800 | 2.95693300  | H | -1.00799000 | -4.42592000 | 2.40919700  |
| H | -0.02620500 | -2.26384100 | 4.01500500  | H | -0.23387000 | -2.44352800 | 3.72797300  |

|                                                       |             |             |             |                                                       |             |             |             |
|-------------------------------------------------------|-------------|-------------|-------------|-------------------------------------------------------|-------------|-------------|-------------|
| H                                                     | -1.25629100 | -2.48727300 | 5.30033600  | H                                                     | -1.47898100 | -2.76541900 | 4.97023800  |
| H                                                     | -1.16075800 | -0.95534100 | 4.37025000  | H                                                     | -1.36701200 | -1.16024400 | 4.19517700  |
| H                                                     | -2.03306700 | 1.27363100  | 2.30887000  | H                                                     | -2.06641100 | 0.95639600  | 2.53728700  |
| H                                                     | -3.92055100 | 2.89369300  | 2.75553800  | H                                                     | -4.06387100 | 2.38378600  | 3.11654900  |
| H                                                     | -4.86530700 | 4.17076500  | 0.76316200  | H                                                     | -5.14135400 | 3.70788200  | 1.23464500  |
| H                                                     | -3.92683600 | 3.80113300  | -1.47250900 | H                                                     | -4.22470800 | 3.56782300  | -1.03514400 |
| H                                                     | -0.03070700 | 2.26235600  | -4.01554700 | H                                                     | -0.23798200 | 2.44295600  | -3.72812000 |
| H                                                     | -1.26144700 | 2.48375900  | -5.30061600 | H                                                     | -1.48365500 | 2.76294700  | -4.97031200 |
| H                                                     | -1.16357800 | 0.95223100  | -4.37011900 | H                                                     | -1.36918500 | 1.15794300  | -4.19526700 |
| H                                                     | -2.49546300 | 4.69373300  | -2.57121800 | H                                                     | -2.72887800 | 4.68780800  | -2.02079700 |
| H                                                     | -1.98195900 | 4.60049900  | -4.27173400 | H                                                     | -2.18171000 | 4.78619800  | -3.70802500 |
| H                                                     | -0.79423900 | 4.37370700  | -2.95789400 | H                                                     | -1.01509100 | 4.42416800  | -2.40926800 |
| H                                                     | -3.60535200 | 1.18994200  | -3.81226600 | H                                                     | -3.81494200 | 1.34158800  | -3.62627100 |
| H                                                     | -3.66746300 | 2.67960400  | -4.79588200 | H                                                     | -3.85390300 | 2.92238800  | -4.45160900 |
| H                                                     | -4.27585100 | 2.67995100  | -3.12335500 | H                                                     | -4.49141500 | 2.75950300  | -2.80547800 |
| Np                                                    | 0.00000800  | 0.00000600  | 0.00007500  | Np                                                    | 0.00000100  | 0.00000000  | -0.00005400 |
| Np[( <sup>13</sup> BuNO)py] <sub>4</sub> <sup>+</sup> |             |             |             | Pu[( <sup>13</sup> BuNO)py] <sub>4</sub> <sup>-</sup> |             |             |             |
| O                                                     | 1.01479800  | 1.25192500  | 1.48502900  | O                                                     | -1.34861000 | 0.00826400  | 1.96618100  |
| O                                                     | 1.01665500  | -1.25039300 | -1.48502200 | O                                                     | 0.08594000  | 1.34624400  | -1.96624400 |
| O                                                     | -1.01476100 | -1.25187900 | 1.48512200  | O                                                     | 1.34861000  | -0.00826400 | 1.96618100  |
| O                                                     | -1.01670900 | 1.25031600  | -1.48503800 | O                                                     | -0.08594000 | -1.34624400 | -1.96624400 |
| N                                                     | 2.07963100  | 2.08832500  | 1.41018300  | N                                                     | -2.70809600 | 0.03043900  | 1.99799700  |
| N                                                     | 1.90430500  | 1.50013800  | -0.80086500 | N                                                     | -2.53979600 | 0.06447900  | -0.29223000 |
| N                                                     | 2.08276000  | -2.08517500 | -1.41021500 | N                                                     | 0.16212800  | 2.70393900  | -1.99564800 |
| N                                                     | 1.90661400  | -1.49727800 | 0.80084200  | N                                                     | 0.00000000  | 2.54078000  | 0.28951900  |
| N                                                     | -2.07959100 | -2.08829000 | 1.41035000  | N                                                     | 2.70809600  | -0.03043900 | 1.99799700  |
| N                                                     | -1.90434000 | -1.50020300 | -0.80073000 | N                                                     | 2.53979600  | -0.06447900 | -0.29223000 |
| N                                                     | -2.08280400 | 2.08510900  | -1.41023100 | N                                                     | -0.16212800 | -2.70393900 | -1.99564800 |
| N                                                     | -1.90660200 | 1.49729000  | 0.80084200  | N                                                     | 0.00000000  | -2.54078000 | 0.28951900  |
| C                                                     | 2.55591500  | 2.25476700  | 0.13739300  | C                                                     | -3.36742900 | 0.07174800  | 0.81132700  |
| C                                                     | 2.29273800  | 1.58964700  | -2.09305000 | C                                                     | -3.08793900 | 0.10372200  | -1.52334300 |
| C                                                     | 3.32114300  | 2.40808400  | -2.53268000 | C                                                     | -4.45472600 | 0.15106200  | -1.77253700 |
| C                                                     | 3.99834800  | 3.17945600  | -1.56837800 | C                                                     | -5.31181400 | 0.16293600  | -0.64951700 |
| C                                                     | 3.62794100  | 3.11147600  | -0.23681900 | C                                                     | -4.78836300 | 0.12518800  | 0.63095900  |
| C                                                     | 2.45611200  | 2.83717500  | 2.66218300  | C                                                     | -3.32837000 | 0.00226500  | 3.36025700  |
| C                                                     | 3.92314600  | 2.53415500  | 3.02505800  | C                                                     | -4.11322900 | 1.30663400  | 3.61928200  |
| C                                                     | 2.19603300  | 4.34448100  | 2.47083200  | C                                                     | -4.20870100 | -1.25556400 | 3.52584300  |
| C                                                     | 1.56303400  | 2.33412200  | 3.80648200  | C                                                     | -2.19815000 | -0.08126300 | 4.39984500  |
| C                                                     | 2.55937700  | -2.25086700 | -0.13745100 | C                                                     | 0.08859700  | 3.36628400  | -0.81210400 |
| C                                                     | 2.29523100  | -1.58618800 | 2.09301200  | C                                                     | -0.07098700 | 3.09173700  | 1.51796700  |
| C                                                     | 3.32494500  | -2.40300200 | 2.53259700  | C                                                     | -0.06266600 | 4.45955300  | 1.76599600  |
| C                                                     | 4.00334700  | -3.17327500 | 1.56825800  | C                                                     | 0.01733800  | 5.31474700  | 0.64435400  |
| C                                                     | 3.63278900  | -3.10586500 | 0.23671100  | C                                                     | 0.09050800  | 4.78837300  | -0.63341800 |
| C                                                     | 2.46046000  | -2.83328200 | -2.66229000 | C                                                     | 0.26587400  | 3.32068500  | -3.35577100 |
| C                                                     | 1.56647000  | -2.33164400 | -3.80649300 | C                                                     | 0.36002300  | 2.18643800  | -4.39017800 |
| C                                                     | 2.20293800  | -4.34104700 | -2.47108400 | C                                                     | 1.55582400  | 4.16167300  | -3.47027300 |

|   |             |             |             |   |             |             |             |
|---|-------------|-------------|-------------|---|-------------|-------------|-------------|
| C | 3.92695900  | -2.52773700 | -3.02520400 | C | -1.00217600 | 4.14447600  | -3.66872700 |
| C | -2.55591700 | -2.25479300 | 0.13758300  | C | 3.36742900  | -0.07174800 | 0.81132700  |
| C | -2.29281300 | -1.58977000 | -2.09290000 | C | 3.08793900  | -0.10372200 | -1.52334300 |
| C | -3.32122800 | -2.40823100 | -2.53246300 | C | 4.45472600  | -0.15106200 | -1.77253700 |
| C | -3.99839900 | -3.17956300 | -1.56810600 | C | 5.31181400  | -0.16293600 | -0.64951700 |
| C | -3.62795100 | -3.11152300 | -0.23656100 | C | 4.78836300  | -0.12518800 | 0.63095900  |
| C | -2.45602600 | -2.83706400 | 2.66240900  | C | 3.32837000  | -0.00226500 | 3.36025700  |
| C | -3.92302300 | -2.53396800 | 3.02537300  | C | 4.11322900  | -1.30663400 | 3.61928200  |
| C | -2.19600700 | -4.34439000 | 2.47113100  | C | 4.20870100  | 1.25556400  | 3.52584300  |
| C | -1.56285600 | -2.33397700 | 3.80661800  | C | 2.19815000  | 0.08126300  | 4.39984500  |
| C | -2.55938300 | 2.25085000  | -0.13746200 | C | -0.08859700 | -3.36628400 | -0.81210400 |
| C | -2.29518500 | 1.58625300  | 2.09301800  | C | 0.07098700  | -3.09173700 | 1.51796700  |
| C | -3.32488000 | 2.40309600  | 2.53259700  | C | 0.06266600  | -4.45955300 | 1.76599600  |
| C | -4.00329600 | 3.17334200  | 1.56824700  | C | -0.01733800 | -5.31474700 | 0.64435400  |
| C | -3.63277200 | 3.10587700  | 0.23669200  | C | -0.09050800 | -4.78837300 | -0.63341800 |
| C | -2.46054100 | 2.83318500  | -2.66231200 | C | -0.26587400 | -3.32068500 | -3.35577100 |
| C | -1.56659000 | 2.33153000  | -3.80654100 | C | -0.36002300 | -2.18643800 | -4.39017800 |
| C | -2.20301900 | 4.34095200  | -2.47113200 | C | -1.55582400 | -4.16167300 | -3.47027300 |
| C | -3.92705600 | 2.52763900  | -3.02516200 | C | 1.00217600  | -4.14447600 | -3.66872700 |
| H | 1.73160400  | 0.95684400  | -2.78510300 | H | -2.35177300 | 0.09680300  | -2.33395400 |
| H | 3.59098700  | 2.44315500  | -3.58912500 | H | -4.83776200 | 0.18205600  | -2.79508100 |
| H | 4.82038200  | 3.83695700  | -1.86271200 | H | -6.39882700 | 0.20530600  | -0.77973300 |
| H | 4.15661900  | 3.70818300  | 0.50223900  | H | -5.46758800 | 0.14255100  | 1.48156500  |
| H | 4.07018000  | 1.45143000  | 3.15350000  | H | -3.43956400 | 2.16990500  | 3.50810800  |
| H | 4.17632800  | 3.02883400  | 3.97484600  | H | -4.51741200 | 1.31275800  | 4.64569800  |
| H | 4.64321400  | 2.88309000  | 2.27369300  | H | -4.95259000 | 1.45134600  | 2.92610100  |
| H | 2.80513000  | 4.79405000  | 1.67559900  | H | -5.05196800 | -1.29223800 | 2.82372400  |
| H | 2.42556700  | 4.88056500  | 3.40404800  | H | -4.61886700 | -1.30099400 | 4.54883300  |
| H | 1.13758400  | 4.52185100  | 2.22831500  | H | -3.59877700 | -2.15624900 | 3.35843900  |
| H | 0.49986400  | 2.52067200  | 3.60636600  | H | -1.59044100 | -0.98293900 | 4.25562000  |
| H | 1.84368100  | 2.87450000  | 4.72228400  | H | -2.65224000 | -0.10603900 | 5.40507800  |
| H | 1.69879000  | 1.25943200  | 3.98918700  | H | -1.52350300 | 0.78036000  | 4.32889100  |
| H | 1.73312700  | -0.95427100 | 2.78508800  | H | -0.14338800 | 2.35704000  | 2.32682200  |
| H | 3.59488300  | -2.43765900 | 3.58903100  | H | -0.12310500 | 4.84502200  | 2.78631100  |
| H | 4.82644300  | -3.82946300 | 1.86255200  | H | 0.01675100  | 6.40275100  | 0.77319900  |
| H | 4.16241100  | -3.70170300 | -0.50237100 | H | 0.13959000  | 5.46643100  | -1.48373200 |
| H | 0.50363100  | -2.52003000 | -3.60633300 | H | 1.24395200  | 1.56039000  | -4.21468900 |
| H | 1.84799100  | -2.87145000 | -4.72236300 | H | 0.43120200  | 2.63743900  | -5.39457000 |
| H | 1.70037800  | -1.25670500 | -3.98909800 | H | -0.51747900 | 1.53069400  | -4.34690400 |
| H | 2.81280200  | -4.78967100 | -1.67590800 | H | 1.58883600  | 5.00895400  | -2.77310500 |
| H | 2.43336800  | -4.87664500 | -3.40435700 | H | 1.65723400  | 4.56251400  | -4.49291600 |
| H | 1.14479400  | -4.52023900 | -2.22857000 | H | 2.42955000  | 3.52616300  | -3.26057100 |
| H | 4.07214400  | -1.44475000 | -3.15355100 | H | -1.88888900 | 3.49651000  | -3.59595500 |
| H | 4.18094700  | -3.02189800 | -3.97504600 | H | -0.95332100 | 4.55072100  | -4.69319800 |
| H | 4.64764300  | -2.87551100 | -2.27389100 | H | -1.15005400 | 4.98630200  | -2.97890300 |
| H | -1.73170200 | -0.95699700 | -2.78499800 | H | 2.35177300  | -0.09680300 | -2.33395400 |

|                                                      |             |             |             |                                                      |             |             |             |
|------------------------------------------------------|-------------|-------------|-------------|------------------------------------------------------|-------------|-------------|-------------|
| H                                                    | -3.59110400 | -2.44335000 | -3.58889700 | H                                                    | 4.83776200  | -0.18205600 | -2.79508100 |
| H                                                    | -4.82043700 | -3.83708300 | -1.86238600 | H                                                    | 6.39882700  | -0.20530600 | -0.77973300 |
| H                                                    | -4.15660400 | -3.70820300 | 0.50253500  | H                                                    | 5.46758800  | -0.14255100 | 1.48156500  |
| H                                                    | -4.07000900 | -1.45122900 | 3.15375000  | H                                                    | 3.43956400  | -2.16990500 | 3.50810800  |
| H                                                    | -4.17615000 | -3.02857100 | 3.97521400  | H                                                    | 4.51741200  | -1.31275800 | 4.64569800  |
| H                                                    | -4.64316100 | -2.88293000 | 2.27408800  | H                                                    | 4.95259000  | -1.45134600 | 2.92610100  |
| H                                                    | -2.80516000 | -4.79398600 | 1.67595500  | H                                                    | 5.05196800  | 1.29223800  | 2.82372400  |
| H                                                    | -2.42550800 | -4.88041400 | 3.40438900  | H                                                    | 4.61886700  | 1.30099400  | 4.54883300  |
| H                                                    | -1.13757600 | -4.52181000 | 2.22856700  | H                                                    | 3.59877700  | 2.15624900  | 3.35843900  |
| H                                                    | -0.49970800 | -2.52060100 | 3.60645400  | H                                                    | 1.59044100  | 0.98293900  | 4.25562000  |
| H                                                    | -1.84348000 | -2.87427200 | 4.72247600  | H                                                    | 2.65224000  | 0.10603900  | 5.40507800  |
| H                                                    | -1.69854200 | -1.25926600 | 3.98925200  | H                                                    | 1.52350300  | -0.78036000 | 4.32889100  |
| H                                                    | -1.73307100 | 0.95435600  | 2.78510400  | H                                                    | 0.14338800  | -2.35704000 | 2.32682200  |
| H                                                    | -3.59479000 | 2.43779700  | 3.58903600  | H                                                    | 0.12310500  | -4.84502200 | 2.78631100  |
| H                                                    | -4.82637600 | 3.82955300  | 1.86253600  | H                                                    | -0.01675100 | -6.40275100 | 0.77319900  |
| H                                                    | -4.16240200 | 3.70169500  | -0.50240100 | H                                                    | -0.13959000 | -5.46643100 | -1.48373200 |
| H                                                    | -0.50374000 | 2.51987200  | -3.60640000 | H                                                    | -1.24395200 | -1.56039000 | -4.21468900 |
| H                                                    | -1.84810800 | 2.87136100  | -4.72239800 | H                                                    | -0.43120200 | -2.63743900 | -5.39457000 |
| H                                                    | -1.70054200 | 1.25659900  | -3.98916100 | H                                                    | 0.51747900  | -1.53069400 | -4.34690400 |
| H                                                    | -2.81286900 | 4.78958500  | -1.67595000 | H                                                    | -1.58883600 | -5.00895400 | -2.77310500 |
| H                                                    | -2.43347100 | 4.87653600  | -3.40440900 | H                                                    | -1.65723400 | -4.56251400 | -4.49291600 |
| H                                                    | -1.14487100 | 4.52015100  | -2.22864400 | H                                                    | -2.42955000 | -3.52616300 | -3.26057100 |
| H                                                    | -4.07224600 | 1.44465300  | -3.15350400 | H                                                    | 1.88888900  | -3.49651000 | -3.59595500 |
| H                                                    | -4.18108800 | 3.02180200  | -3.97499100 | H                                                    | 0.95332100  | -4.55072100 | -4.69319800 |
| H                                                    | -4.64770700 | 2.87541100  | -2.27381500 | H                                                    | 1.15005400  | -4.98630200 | -2.97890300 |
| Np                                                   | -0.00000600 | -0.00001200 | 0.00002000  | Pu                                                   | 0.00000000  | 0.00000000  | -0.00046400 |
| Pu[( <sup>t</sup> BuNO)py] <sub>4</sub> <sup>0</sup> |             |             |             | Pu[( <sup>t</sup> BuNO)py] <sub>4</sub> <sup>+</sup> |             |             |             |
| O                                                    | 0.73776200  | 1.14269700  | 1.84978700  | O                                                    | -0.63589200 | 1.31205100  | 1.60533300  |
| O                                                    | 0.73966700  | -1.14145900 | -1.84975500 | O                                                    | 1.54852600  | 0.23072600  | -1.70491500 |
| O                                                    | -0.73779300 | -1.14272500 | 1.84977300  | O                                                    | 0.63589200  | -1.31205100 | 1.60533300  |
| O                                                    | -0.73965200 | 1.14143800  | -1.84976400 | O                                                    | -1.54852600 | -0.23072600 | -1.70491500 |
| N                                                    | 1.70555600  | 2.09229400  | 1.92023900  | N                                                    | -0.71399900 | 2.64385400  | 1.67334200  |
| N                                                    | 1.96472300  | 1.59138100  | -0.30169400 | N                                                    | -0.26674400 | 2.49521000  | -0.57771400 |
| N                                                    | 1.70902900  | -2.08945300 | -1.92022800 | N                                                    | 2.80513700  | 0.73363300  | -1.65984800 |
| N                                                    | 1.96723800  | -1.58830300 | 0.30176200  | N                                                    | 2.28336700  | 0.91404900  | 0.57415600  |
| N                                                    | -1.70558500 | -2.09232300 | 1.92021400  | N                                                    | 0.71399900  | -2.64385400 | 1.67334200  |
| N                                                    | -1.96472600 | -1.59141100 | -0.30171900 | N                                                    | 0.26674400  | -2.49521000 | -0.57771400 |
| N                                                    | -1.70902000 | 2.08942700  | -1.92024600 | N                                                    | -2.80513700 | -0.73363300 | -1.65984800 |
| N                                                    | -1.96725400 | 1.58826900  | 0.30174000  | N                                                    | -2.28336700 | -0.91404900 | 0.57415600  |
| C                                                    | 2.39627600  | 2.33095400  | 0.76960600  | C                                                    | -0.53030500 | 3.31389100  | 0.48538200  |
| C                                                    | 2.57628900  | 1.74102800  | -1.49535500 | C                                                    | -0.09640200 | 3.04837400  | -1.79861700 |
| C                                                    | 3.63185000  | 2.61348100  | -1.72015800 | C                                                    | -0.17216600 | 4.41191700  | -2.04437300 |
| C                                                    | 4.08436100  | 3.37499600  | -0.62321900 | C                                                    | -0.42343600 | 5.25836600  | -0.94872100 |
| C                                                    | 3.48310900  | 3.24501100  | 0.61574700  | C                                                    | -0.60123900 | 4.72366300  | 0.31615300  |
| C                                                    | 1.86286500  | 2.78855400  | 3.24076600  | C                                                    | -1.11218500 | 3.23556500  | 3.00835600  |
| C                                                    | 3.25413800  | 2.48716600  | 3.83586900  | C                                                    | 0.00000000  | 4.17635600  | 3.51301600  |

|   |             |             |             |   |             |             |             |
|---|-------------|-------------|-------------|---|-------------|-------------|-------------|
| C | 1.61148000  | 4.30206600  | 3.07942100  | C | -2.47597000 | 3.94283200  | 2.88217800  |
| C | 0.80020500  | 2.23323800  | 4.20264900  | C | -1.26131700 | 2.08203600  | 4.01159800  |
| C | 2.40002400  | -2.32713500 | -0.76955100 | C | 3.23075200  | 1.07501100  | -0.40004700 |
| C | 2.57895800  | -1.73705400 | 1.49545700  | C | 2.60133600  | 1.22093400  | 1.85017600  |
| C | 3.63586700  | -2.60786200 | 1.72029000  | C | 3.84310800  | 1.70189900  | 2.24026000  |
| C | 4.08962600  | -3.36863100 | 0.62335000  | C | 4.81851100  | 1.87199100  | 1.24080300  |
| C | 3.48825500  | -3.23952600 | -0.61564900 | C | 4.52717800  | 1.56155800  | -0.07700000 |
| C | 1.86744900  | -2.78539500 | -3.24079000 | C | 3.58944600  | 0.72775400  | -2.94678700 |
| C | 0.80406400  | -2.23149200 | -4.20268100 | C | 2.66031800  | 0.23391900  | -4.06655700 |
| C | 1.61818600  | -4.29927800 | -3.07960700 | C | 4.77612400  | -0.25034900 | -2.83363400 |
| C | 3.25831700  | -2.48195400 | -3.83580300 | C | 4.03936700  | 2.16144700  | -3.29043400 |
| C | -2.39629600 | -2.33098800 | 0.76957300  | C | 0.53030500  | -3.31389100 | 0.48538200  |
| C | -2.57627000 | -1.74105500 | -1.49539400 | C | 0.09640200  | -3.04837400 | -1.79861700 |
| C | -3.63182400 | -2.61350600 | -1.72022300 | C | 0.17216600  | -4.41191700 | -2.04437300 |
| C | -4.08435400 | -3.37502600 | -0.62329700 | C | 0.42343600  | -5.25836600 | -0.94872100 |
| C | -3.48312700 | -3.24504700 | 0.61568000  | C | 0.60123900  | -4.72366300 | 0.31615300  |
| C | -1.86286300 | -2.78855400 | 3.24075900  | C | 1.11218500  | -3.23556500 | 3.00835600  |
| C | -3.25409800 | -2.48713500 | 3.83594100  | C | 0.00000000  | -4.17635600 | 3.51301600  |
| C | -1.61145000 | -4.30207200 | 3.07948000  | C | 2.47597000  | -3.94283200 | 2.88217800  |
| C | -0.80015500 | -2.23317900 | 4.20254900  | C | 1.26131700  | -2.08203600 | 4.01159800  |
| C | -2.40002500 | 2.32710200  | -0.76957800 | C | -3.23075200 | -1.07501100 | -0.40004700 |
| C | -2.57899400 | 1.73702000  | 1.49542500  | C | -2.60133600 | -1.22093400 | 1.85017600  |
| C | -3.63590400 | 2.60783300  | 1.72023800  | C | -3.84310800 | -1.70189900 | 2.24026000  |
| C | -4.08964000 | 3.36860800  | 0.62329300  | C | -4.81851100 | -1.87199100 | 1.24080300  |
| C | -3.48824900 | 3.23950200  | -0.61569600 | C | -4.52717800 | -1.56155800 | -0.07700000 |
| C | -1.86745700 | 2.78539000  | -3.24079600 | C | -3.58944600 | -0.72775400 | -2.94678700 |
| C | -0.80401400 | 2.23162700  | -4.20270700 | C | -2.66031800 | -0.23391900 | -4.06655700 |
| C | -1.61834600 | 4.29928800  | -3.07953400 | C | -4.77612400 | 0.25034900  | -2.83363400 |
| C | -3.25829700 | 2.48186500  | -3.83582800 | C | -4.03936700 | -2.16144700 | -3.29043400 |
| H | 2.16800200  | 1.11175200  | -2.29203800 | H | 0.11292000  | 2.33593800  | -2.60130000 |
| H | 4.08962300  | 2.69485700  | -2.70751300 | H | -0.03600400 | 4.80339800  | -3.05354200 |
| H | 4.91892300  | 4.07281300  | -0.74031400 | H | -0.47923900 | 6.34123600  | -1.08573000 |
| H | 3.85176500  | 3.83177600  | 1.45417000  | H | -0.78804100 | 5.38603100  | 1.15722400  |
| H | 3.38332600  | 1.40134000  | 3.96003500  | H | 0.95656100  | 3.63744200  | 3.58495300  |
| H | 3.34987100  | 2.95843000  | 4.82693900  | H | -0.26004900 | 4.54380700  | 4.51704900  |
| H | 4.08216800  | 2.85146700  | 3.21334400  | H | 0.15944100  | 5.05451500  | 2.87477600  |
| H | 2.33102600  | 4.79700500  | 2.41418900  | H | -2.46747200 | 4.79805300  | 2.19444700  |
| H | 1.67118100  | 4.79739800  | 4.06146800  | H | -2.78637700 | 4.31718900  | 3.86923800  |
| H | 0.60439100  | 4.47327500  | 2.67060000  | H | -3.24149200 | 3.23435100  | 2.53238600  |
| H | -0.21495400 | 2.42423900  | 3.83137600  | H | -2.04691300 | 1.37882200  | 3.70664400  |
| H | 0.92154500  | 2.73345300  | 5.17643100  | H | -1.53763100 | 2.51134200  | 4.98599300  |
| H | 0.90731200  | 1.15028000  | 4.34277300  | H | -0.32550900 | 1.52034800  | 4.13405600  |
| H | 2.16962700  | -1.10846700 | 2.29214900  | H | 1.79810000  | 1.05524400  | 2.57202800  |
| H | 4.09370200  | -2.68856700 | 2.70767100  | H | 4.04674800  | 1.93306200  | 3.28694200  |
| H | 4.92525200  | -4.06516900 | 0.74047500  | H | 5.81402600  | 2.24488200  | 1.49515900  |
| H | 3.85786100  | -3.82570700 | -1.45405900 | H | 5.28940300  | 1.68843700  | -0.84135200 |

|                                                      |             |             |             |                                                      |             |             |             |
|------------------------------------------------------|-------------|-------------|-------------|------------------------------------------------------|-------------|-------------|-------------|
| H                                                    | -0.21084700 | -2.42399300 | -3.83150800 | H                                                    | 2.30932200  | -0.78989400 | -3.88317000 |
| H                                                    | 0.92619600  | -2.73141300 | -5.17651300 | H                                                    | 3.22520800  | 0.24366600  | -5.01015900 |
| H                                                    | 0.90962900  | -1.14836300 | -4.34266700 | H                                                    | 1.78185900  | 0.88252600  | -4.18504600 |
| H                                                    | 2.33839800  | -4.79327100 | -2.41439400 | H                                                    | 5.50382600  | 0.03402200  | -2.06238800 |
| H                                                    | 1.67862000  | -4.79443100 | -4.06169900 | H                                                    | 5.31279600  | -0.29288500 | -3.79351600 |
| H                                                    | 0.61132100  | -4.47193900 | -2.67084300 | H                                                    | 4.41542000  | -1.26343800 | -2.60113000 |
| H                                                    | 3.38593700  | -1.39593500 | -3.95989900 | H                                                    | 3.16786700  | 2.82893900  | -3.36498300 |
| H                                                    | 3.35477700  | -2.95301700 | -4.82689700 | H                                                    | 4.55283300  | 2.16165100  | -4.26364500 |
| H                                                    | 4.08685000  | -2.84508800 | -3.21327000 | H                                                    | 4.73066000  | 2.59488700  | -2.55663800 |
| H                                                    | -2.16796600 | -1.11177500 | -2.29206600 | H                                                    | -0.11292000 | -2.33593800 | -2.60130000 |
| H                                                    | -4.08957700 | -2.69487800 | -2.70758800 | H                                                    | 0.03600400  | -4.80339800 | -3.05354200 |
| H                                                    | -4.91891300 | -4.07284400 | -0.74041300 | H                                                    | 0.47923900  | -6.34123600 | -1.08573000 |
| H                                                    | -3.85180400 | -3.83182000 | 1.45408600  | H                                                    | 0.78804100  | -5.38603100 | 1.15722400  |
| H                                                    | -3.38327200 | -1.40130300 | 3.96007200  | H                                                    | -0.95656100 | -3.63744200 | 3.58495300  |
| H                                                    | -3.34976700 | -2.95835500 | 4.82703800  | H                                                    | 0.26004900  | -4.54380700 | 4.51704900  |
| H                                                    | -4.08217400 | -2.85145400 | 3.21349300  | H                                                    | -0.15944100 | -5.05451500 | 2.87477600  |
| H                                                    | -2.33101000 | -4.79706600 | 2.41430800  | H                                                    | 2.46747200  | -4.79805300 | 2.19444700  |
| H                                                    | -1.67109400 | -4.79735400 | 4.06155500  | H                                                    | 2.78637700  | -4.31718900 | 3.86923800  |
| H                                                    | -0.60437500 | -4.47327900 | 2.67062400  | H                                                    | 3.24149200  | -3.23435100 | 2.53238600  |
| H                                                    | 0.21498300  | -2.42418500 | 3.83122200  | H                                                    | 2.04691300  | -1.37882200 | 3.70664400  |
| H                                                    | -0.92143000 | -2.73334500 | 5.17636200  | H                                                    | 1.53763100  | -2.51134200 | 4.98599300  |
| H                                                    | -0.90727000 | -1.15021400 | 4.34262200  | H                                                    | 0.32550900  | -1.52034800 | 4.13405600  |
| H                                                    | -2.16967900 | 1.10843100  | 2.29212300  | H                                                    | -1.79810000 | -1.05524400 | 2.57202800  |
| H                                                    | -4.09375600 | 2.68854000  | 2.70761200  | H                                                    | -4.04674800 | -1.93306200 | 3.28694200  |
| H                                                    | -4.92526200 | 4.06515200  | 0.74040500  | H                                                    | -5.81402600 | -2.24488200 | 1.49515900  |
| H                                                    | -3.85782900 | 3.82568800  | -1.45411600 | H                                                    | -5.28940300 | -1.68843700 | -0.84135200 |
| H                                                    | 0.21087800  | 2.42420400  | -3.83152200 | H                                                    | -2.30932200 | 0.78989400  | -3.88317000 |
| H                                                    | -0.92618700 | 2.73158100  | -5.17651800 | H                                                    | -3.22520800 | -0.24366600 | -5.01015900 |
| H                                                    | -0.90947800 | 1.14849500  | -4.34274500 | H                                                    | -1.78185900 | -0.88252600 | -4.18504600 |
| H                                                    | -2.33861900 | 4.79317100  | -2.41430300 | H                                                    | -5.50382600 | -0.03402200 | -2.06238800 |
| H                                                    | -1.67881800 | 4.79448600  | -4.06160100 | H                                                    | -5.31279600 | 0.29288500  | -3.79351600 |
| H                                                    | -0.61150400 | 4.47202800  | -2.67074700 | H                                                    | -4.41542000 | 1.26343800  | -2.60113000 |
| H                                                    | -3.38583200 | 1.39584000  | -3.95996500 | H                                                    | -3.16786700 | -2.82893900 | -3.36498300 |
| H                                                    | -3.35478600 | 2.95295800  | -4.82690500 | H                                                    | -4.55283300 | -2.16165100 | -4.26364500 |
| H                                                    | -4.08686100 | 2.84491300  | -3.21328500 | H                                                    | -4.73066000 | -2.59488700 | -2.55663800 |
| Pu                                                   | -0.00000400 | -0.00001300 | 0.00002100  | Pu                                                   | 0.00000000  | 0.00000000  | -0.16450400 |
| Am[( <sup>t</sup> BuNO)py] <sub>4</sub> <sup>-</sup> |             |             |             | Am[( <sup>t</sup> BuNO)py] <sub>4</sub> <sup>0</sup> |             |             |             |
| O                                                    | 0.26155900  | -1.39860300 | 1.92341500  | O                                                    | 0.78613497  | 1.16476799  | 1.85517885  |
| O                                                    | -1.41907800 | 0.10944700  | -1.92355000 | O                                                    | 0.78806421  | -1.16346268 | -1.85518660 |
| O                                                    | -0.26155900 | 1.39860300  | 1.92341500  | O                                                    | -0.78614156 | -1.16477270 | 1.85517513  |
| O                                                    | 1.41907800  | -0.10944700 | -1.92355000 | O                                                    | -0.78805429 | 1.16345627  | -1.85519179 |
| N                                                    | 0.53413100  | -2.72931600 | 1.88261000  | N                                                    | 1.59742287  | 2.24309220  | 1.84382897  |
| N                                                    | 0.00000000  | -2.56651500 | -0.34823800 | N                                                    | 1.94599703  | 1.65860248  | -0.35254427 |
| N                                                    | -2.77137400 | 0.23733000  | -1.88255800 | N                                                    | 1.60105283  | -2.24050508 | -1.84383294 |
| N                                                    | -2.55152700 | -0.27571100 | 0.34827100  | N                                                    | 1.94854881  | -1.65559748 | 0.35259837  |
| N                                                    | -0.53413100 | 2.72931600  | 1.88261000  | N                                                    | -1.59743006 | -2.24309571 | 1.84382246  |



|   |             |             |             |   |             |             |             |
|---|-------------|-------------|-------------|---|-------------|-------------|-------------|
| N | 0.0000000   | 2.56651500  | -0.34823800 | N | -1.94599404 | -1.65860750 | -0.35255234 |
| N | 2.77137400  | -0.23733000 | -1.88255800 | N | -1.60103990 | 2.24050089  | -1.84384098 |
| N | 2.55152700  | 0.27571100  | 0.34827100  | N | -1.94854794 | 1.65559238  | 0.35258841  |
| C | 0.32492200  | -3.38543100 | 0.71059400  | C | 2.30510566  | 2.46716337  | 0.69362803  |
| C | -0.23470900 | -3.11001900 | -1.55503500 | C | 2.58769443  | 1.78277310  | -1.53049757 |
| C | -0.16021700 | -4.47246300 | -1.83064400 | C | 3.59986670  | 2.70436227  | -1.76956545 |
| C | 0.16293900  | -5.32397100 | -0.75156200 | C | 3.97877813  | 3.53654883  | -0.69750910 |
| C | 0.39970700  | -4.80410500 | 0.50820300  | C | 3.34885445  | 3.42780520  | 0.53028222  |
| C | 0.96954400  | -3.34257900 | 3.17806000  | C | 1.67616161  | 3.02937179  | 3.12286533  |
| C | -0.13921300 | -4.26252300 | 3.73421600  | C | 3.05084397  | 2.81739435  | 3.79111825  |
| C | 2.31310100  | -4.08223100 | 3.00331400  | C | 1.37627191  | 4.51807102  | 2.85436524  |
| C | 1.20012000  | -2.20627300 | 4.18892400  | C | 0.59087145  | 2.49863763  | 4.07346289  |
| C | -3.40091700 | -0.04182100 | -0.71055400 | C | 2.30902605  | -2.46350957 | -0.69360382 |
| C | -3.06631900 | -0.56742600 | 1.55520500  | C | 2.59037070  | -1.77881379 | 1.53058338  |
| C | -4.42880100 | -0.64106500 | 1.83088700  | C | 3.60401764  | -2.69878061 | 1.76965163  |
| C | -5.31038200 | -0.41315300 | 0.75163200  | C | 3.98434821  | -3.53027426 | 0.69755985  |
| C | -4.81930600 | -0.12194500 | -0.50828500 | C | 3.35432496  | -3.42246567 | -0.53026248 |
| C | -3.42797900 | 0.60459400  | -3.17783500 | C | 1.68106680  | -3.02662523 | -3.12288496 |
| C | -2.32315300 | 0.95913900  | -4.18775300 | C | 0.59486427  | -2.49766362 | -4.07342729 |
| C | -4.31001900 | 1.85914400  | -3.00222300 | C | 1.38364333  | -4.51582636 | -2.85441785 |
| C | -4.22102800 | -0.59741000 | -3.73562600 | C | 3.05537671  | -2.81234997 | -3.79117155 |
| C | -0.32492200 | 3.38543100  | 0.71059400  | C | -2.30510813 | -2.46716846 | 0.69361836  |
| C | 0.23470900  | 3.11001900  | -1.55503500 | C | -2.58768423 | -1.78277836 | -1.53050960 |
| C | 0.16021700  | 4.47246300  | -1.83064400 | C | -3.59985485 | -2.70436743 | -1.76958408 |
| C | -0.16293900 | 5.32397100  | -0.75156200 | C | -3.97877230 | -3.53655418 | -0.69753020 |
| C | -0.39970700 | 4.80410500  | 0.50820300  | C | -3.34885588 | -3.42781081 | 0.53026485  |
| C | -0.96954400 | 3.34257900  | 3.17806000  | C | -1.67616484 | -3.02937195 | 3.12286099  |
| C | 0.13921300  | 4.26252300  | 3.73421600  | C | -3.05084219 | -2.81739202 | 3.79112461  |
| C | -2.31310100 | 4.08223100  | 3.00331400  | C | -1.37626826 | -4.51807201 | 2.85437042  |
| C | -1.20012000 | 2.20627300  | 4.18892400  | C | -0.59087042 | -2.49862645 | 4.07344625  |
| C | 3.40091700  | 0.04182100  | -0.71055400 | C | -2.30901827 | 2.46350415  | -0.69361594 |
| C | 3.06631900  | 0.56742600  | 1.55520500  | C | -2.59037852 | 1.77880918  | 1.53056854  |
| C | 4.42880100  | 0.64106500  | 1.83088700  | C | -3.60402813 | 2.69877581  | 1.76962770  |
| C | 5.31038200  | 0.41315300  | 0.75163200  | C | -3.98435278 | 3.53026707  | 0.69753154  |
| C | 4.81930600  | 0.12194500  | -0.50828500 | C | -3.35432047 | 3.42245753  | -0.53028600 |
| C | 3.42797900  | -0.60459400 | -3.17783500 | C | -1.68106122 | 3.02662591  | -3.12288978 |
| C | 2.32315300  | -0.95913900 | -4.18775300 | C | -0.59490936 | 2.49763583  | -4.07347601 |
| C | 4.31001900  | -1.85914400 | -3.00222300 | C | -1.38358278 | 4.51581547  | -2.85442220 |
| C | 4.22102800  | 0.59741000  | -3.73562600 | C | -3.05540432 | 2.81240517  | -3.79112388 |
| H | -0.49915200 | -2.37800600 | -2.32665200 | H | 2.24219323  | 1.09198994  | -2.30632576 |
| H | -0.35874900 | -4.85579200 | -2.83399600 | H | 4.08033946  | 2.76762876  | -2.74750835 |
| H | 0.21505600  | -6.40881200 | -0.89716700 | H | 4.78382782  | 4.26720448  | -0.82101500 |
| H | 0.61460200  | -5.48482300 | 1.33026800  | H | 3.67627901  | 4.05585225  | 1.35578090  |
| H | -1.06849700 | -3.68548600 | 3.85646600  | H | 3.21497586  | 1.74556258  | 3.97909591  |
| H | 0.15031000  | -4.66332000 | 4.72041400  | H | 3.08590460  | 3.34304188  | 4.75859471  |
| H | -0.36119500 | -5.11393300 | 3.07607600  | H | 3.88975270  | 3.18229022  | 3.18314920  |

|    |             |             |             |    |             |             |             |
|----|-------------|-------------|-------------|----|-------------|-------------|-------------|
| H  | 2.26571000  | -4.91977100 | 2.29569200  | H  | 2.10289355  | 5.00371836  | 2.19081814  |
| H  | 2.65140400  | -4.48113300 | 3.97439700  | H  | 1.37485515  | 5.07199126  | 3.80634533  |
| H  | 3.07548900  | -3.37909600 | 2.63562500  | H  | 0.38128085  | 4.62353470  | 2.39664951  |
| H  | 1.97659600  | -1.51537800 | 3.83590100  | H  | -0.41165466 | 2.61843514  | 3.64162166  |
| H  | 1.52232700  | -2.65201900 | 5.14543600  | H  | 0.64233009  | 3.07404115  | 5.01127378  |
| H  | 0.28707100  | -1.62082900 | 4.34789800  | H  | 0.73475635  | 1.43495059  | 4.29858286  |
| H  | -2.30984800 | -0.75063900 | 2.32679900  | H  | 2.24370018  | -1.08865103 | 2.30644091  |
| H  | -4.78829600 | -0.87952800 | 2.83436700  | H  | 4.08453123  | -2.76133641 | 2.74762027  |
| H  | -6.39444900 | -0.47954200 | 0.89719000  | H  | 4.79058022  | -4.25962550 | 0.82106310  |
| H  | -5.51927800 | 0.01662000  | -1.33061200 | H  | 3.68282237  | -4.04991107 | -1.35579114 |
| H  | -1.72133400 | 1.80595200  | -3.83332000 | H  | -0.40743905 | -2.61910195 | -3.64152564 |
| H  | -2.80090900 | 1.23201800  | -5.14415700 | H  | 0.64721426  | -3.07297943 | -5.01124212 |
| H  | -1.64143300 | 0.11568400  | -4.34746000 | H  | 0.73699618  | -1.43374177 | -4.29855050 |
| H  | -5.13788700 | 1.71993900  | -2.29532400 | H  | 2.11107332  | -5.00029225 | -2.19089324 |
| H  | -4.74279900 | 2.15287700  | -3.97329900 | H  | 1.38312994  | -5.06972205 | -3.80641323 |
| H  | -3.69455100 | 2.69336700  | -2.63329500 | H  | 0.38883289  | -4.62294688 | -2.39669293 |
| H  | -3.54585700 | -1.45794700 | -3.85850600 | H  | 3.21772690  | -1.74024120 | -3.97911801 |
| H  | -4.65071700 | -0.35239300 | -4.72172000 | H  | 3.09128328  | -3.33790436 | -4.75866797 |
| H  | -5.04328000 | -0.91169400 | -3.07802400 | H  | 3.89490710  | -3.17587632 | -3.18323937 |
| H  | 0.49915200  | 2.37800600  | -2.32665200 | H  | -2.24217778 | -1.09199566 | -2.30633584 |
| H  | 0.35874900  | 4.85579200  | -2.83399600 | H  | -4.08032145 | -2.76763407 | -2.74753002 |
| H  | -0.21505600 | 6.40881200  | -0.89716700 | H  | -4.78382082 | -4.26721027 | -0.82104129 |
| H  | -0.61460200 | 5.48482300  | 1.33026800  | H  | -3.67628570 | -4.05585916 | 1.35575985  |
| H  | 1.06849700  | 3.68548600  | 3.85646600  | H  | -3.21497375 | -1.74555933 | 3.97909712  |
| H  | -0.15031000 | 4.66332000  | 4.72041400  | H  | -3.08589340 | -3.34303309 | 4.75860495  |
| H  | 0.36119500  | 5.11393300  | 3.07607600  | H  | -3.88975641 | -3.18229233 | 3.18316650  |
| H  | -2.26571000 | 4.91977100  | 2.29569200  | H  | -2.10288943 | -5.00372891 | 2.19083030  |
| H  | -2.65140400 | 4.48113300  | 3.97439700  | H  | -1.37484393 | -5.07198516 | 3.80635464  |
| H  | -3.07548900 | 3.37909600  | 2.63562500  | H  | -0.38127858 | -4.62353373 | 2.39665127  |
| H  | -1.97659600 | 1.51537800  | 3.83590100  | H  | 0.41165316  | -2.61842486 | 3.64159927  |
| H  | -1.52232700 | 2.65201900  | 5.14543600  | H  | -0.64232125 | -3.07402133 | 5.01126271  |
| H  | -0.28707100 | 1.62082900  | 4.34789800  | H  | -0.73475712 | -1.43493761 | 4.29855716  |
| H  | 2.30984800  | 0.75063900  | 2.32679900  | H  | -2.24371390 | 1.08864685  | 2.30642909  |
| H  | 4.78829600  | 0.87952800  | 2.83436700  | H  | -4.08454955 | 2.76133201  | 2.74759247  |
| H  | 6.39444900  | 0.47954200  | 0.89719000  | H  | -4.79058750 | 4.25961659  | 0.82102737  |
| H  | 5.51927800  | -0.01662000 | -1.33061200 | H  | -3.68281317 | 4.04989858  | -1.35582064 |
| H  | 1.72133400  | -1.80595200 | -3.83332000 | H  | 0.40741341  | 2.61903562  | -3.64160904 |
| H  | 2.80090900  | -1.23201800 | -5.14415700 | H  | -0.64727253 | 3.07296308  | -5.01128327 |
| H  | 1.64143300  | -0.11568400 | -4.34746000 | H  | -0.73708523 | 1.43372141  | -4.29860548 |
| H  | 5.13788700  | -1.71993900 | -2.29532400 | H  | -2.11097805 | 5.00029984  | -2.19087261 |
| H  | 4.74279900  | -2.15287700 | -3.97329900 | H  | -1.38308095 | 5.06971699  | -3.80641411 |
| H  | 3.69455100  | -2.69336700 | -2.63329500 | H  | -0.38875525 | 4.62290171  | -2.39672650 |
| H  | 3.54585700  | 1.45794700  | -3.85850600 | H  | -3.21780072 | 1.74030374  | -3.97907191 |
| H  | 4.65071700  | 0.35239300  | -4.72172000 | H  | -3.09133075 | 3.33796905  | -4.75861434 |
| H  | 5.04328000  | 0.91169400  | -3.07802400 | H  | -3.89489640 | 3.17595777  | -3.18315332 |
| Am | 0.00000000  | 0.00000000  | -0.00024500 | Am | 0.00000128  | -0.00000283 | 0.00000203  |

| [Am <sup>III</sup> (μ <sub>2</sub> -( <sup>t</sup> BuNO)py)(2-( <sup>t</sup> BuNO)py) <sub>2</sub> ] <sub>2</sub> |             |             |             |
|-------------------------------------------------------------------------------------------------------------------|-------------|-------------|-------------|
| Am                                                                                                                | 1.95796900  | 0.06586600  | -0.18709000 |
| N                                                                                                                 | 3.42127700  | 1.68842400  | -1.46149100 |
| N                                                                                                                 | 2.75382000  | 3.24711700  | 0.10408800  |
| N                                                                                                                 | 4.10278400  | -0.25405500 | 1.16993700  |
| N                                                                                                                 | 4.54639000  | -2.06180600 | -0.19216100 |
| N                                                                                                                 | 0.82054400  | -0.75185700 | 2.24338600  |
| N                                                                                                                 | -0.98647600 | 0.75911600  | 2.53722900  |
| O                                                                                                                 | 2.10445000  | 2.19378700  | 0.67029000  |
| O                                                                                                                 | 3.39037400  | -1.69562100 | -0.82852700 |
| O                                                                                                                 | 0.15690000  | -0.98148200 | 1.02312200  |
| C                                                                                                                 | 4.16632800  | 1.32227900  | -2.52743700 |
| H                                                                                                                 | 4.05118700  | 0.27414200  | -2.82297700 |
| C                                                                                                                 | 5.01889700  | 2.17237800  | -3.21416400 |
| H                                                                                                                 | 5.58672700  | 1.82043900  | -4.07697600 |
| C                                                                                                                 | 5.12437400  | 3.49726200  | -2.73812200 |
| H                                                                                                                 | 5.79794200  | 4.20844300  | -3.22575400 |
| C                                                                                                                 | 4.39625100  | 3.90614800  | -1.63741600 |
| H                                                                                                                 | 4.52124900  | 4.91943600  | -1.26265000 |
| C                                                                                                                 | 3.52028000  | 2.97903000  | -0.98847700 |
| C                                                                                                                 | 2.54080200  | 4.58456300  | 0.75516500  |
| C                                                                                                                 | 3.84233500  | 5.05819000  | 1.43601700  |
| H                                                                                                                 | 4.17945200  | 4.30685100  | 2.16615900  |
| H                                                                                                                 | 3.66549500  | 6.00304300  | 1.97442600  |
| H                                                                                                                 | 4.66610000  | 5.22671300  | 0.72930600  |
| C                                                                                                                 | 1.46309300  | 4.42142300  | 1.83909400  |
| H                                                                                                                 | 0.51791600  | 4.05687300  | 1.41639700  |
| H                                                                                                                 | 1.28858700  | 5.40547000  | 2.30263900  |
| H                                                                                                                 | 1.76984900  | 3.71297100  | 2.61788300  |
| C                                                                                                                 | 2.01443700  | 5.60618900  | -0.27395500 |
| H                                                                                                                 | 2.70753200  | 5.79678700  | -1.10309400 |
| H                                                                                                                 | 1.82102700  | 6.56878500  | 0.22538600  |
| H                                                                                                                 | 1.06718900  | 5.24950900  | -0.70564300 |
| C                                                                                                                 | 4.43364000  | 0.58144400  | 2.17872800  |
| H                                                                                                                 | 3.72090100  | 1.39910200  | 2.32920000  |
| C                                                                                                                 | 5.56787200  | 0.44734500  | 2.96622700  |
| H                                                                                                                 | 5.77971400  | 1.15319900  | 3.77135800  |
| C                                                                                                                 | 6.43200400  | -0.62698600 | 2.66516000  |
| H                                                                                                                 | 7.34682500  | -0.78237500 | 3.24527300  |
| C                                                                                                                 | 6.14174900  | -1.48921600 | 1.62523300  |
| H                                                                                                                 | 6.83243700  | -2.29859100 | 1.40235100  |
| C                                                                                                                 | 4.94776000  | -1.29332800 | 0.85670800  |
| C                                                                                                                 | 5.24694500  | -3.28485300 | -0.71304600 |
| C                                                                                                                 | 4.43204900  | -3.86074900 | -1.88141500 |
| H                                                                                                                 | 3.39956400  | -4.08307700 | -1.58469400 |
| H                                                                                                                 | 4.91505800  | -4.79396400 | -2.21114100 |

|    |             |             |             |
|----|-------------|-------------|-------------|
| H  | 4.40835700  | -3.16960900 | -2.73454600 |
| C  | 6.64144800  | -2.91266800 | -1.26206000 |
| H  | 6.54208800  | -2.13829100 | -2.03769300 |
| H  | 7.11304500  | -3.79696800 | -1.71975100 |
| H  | 7.32904500  | -2.52841200 | -0.49814100 |
| C  | 5.31395600  | -4.37148900 | 0.38177700  |
| H  | 5.83845400  | -4.04734900 | 1.28952800  |
| H  | 5.83388000  | -5.26292200 | -0.00395500 |
| H  | 4.29645700  | -4.67075200 | 0.67525500  |
| C  | -1.55779100 | 1.78726400  | 3.20509100  |
| H  | -2.50917900 | 2.11815200  | 2.78152800  |
| C  | -0.98932600 | 2.39777900  | 4.31787100  |
| H  | -1.50463200 | 3.21935300  | 4.82004900  |
| C  | 0.27809400  | 1.95894500  | 4.72997700  |
| H  | 0.79606900  | 2.44586900  | 5.56142300  |
| C  | 0.89649600  | 0.92226600  | 4.04270500  |
| H  | 1.91249000  | 0.61835500  | 4.28817800  |
| C  | 1.02184900  | -2.08876200 | 2.97296700  |
| C  | -0.33586200 | -2.59876900 | 3.48070200  |
| H  | -1.05928900 | -2.66149900 | 2.65629500  |
| H  | -0.75200200 | -1.93773500 | 4.25730400  |
| H  | -0.22505300 | -3.60312100 | 3.91966900  |
| C  | 2.01104400  | -1.94503700 | 4.13847900  |
| H  | 2.26238700  | -2.95170300 | 4.50704200  |
| H  | 1.58725000  | -1.39194300 | 4.98833100  |
| H  | 2.94717900  | -1.46185800 | 3.81942800  |
| C  | 1.60677300  | -3.07752400 | 1.95547200  |
| H  | 0.91369900  | -3.24269900 | 1.12178900  |
| H  | 1.79154300  | -4.03910500 | 2.46019600  |
| H  | 2.56168800  | -2.71691400 | 1.54643700  |
| C  | 0.21548700  | 0.30348500  | 2.96980300  |
| Am | -1.95775500 | -0.06571600 | 0.18713300  |
| N  | -3.42118200 | -1.68825600 | 1.46141600  |
| N  | -2.75373900 | -3.24695000 | -0.10415200 |
| N  | -4.10250200 | 0.25370600  | -1.17021400 |
| N  | -4.54686400 | 2.06108800  | 0.19213200  |
| N  | -0.82043400 | 0.75224200  | -2.24323600 |
| N  | 0.98659300  | -0.75870000 | -2.53704200 |
| O  | -2.10401300 | -2.19369100 | -0.67006100 |
| O  | -3.39070400 | 1.69528600  | 0.82841500  |
| O  | -0.15676600 | 0.98191100  | -1.02298400 |
| C  | -4.16629800 | -1.32205800 | 2.52729900  |
| H  | -4.05114000 | -0.27391500 | 2.82280700  |
| C  | -5.01892200 | -2.17211800 | 3.21400300  |
| H  | -5.58680900 | -1.82014300 | 4.07676200  |
| C  | -5.12432400 | -3.49704300 | 2.73805200  |

|   |             |             |             |
|---|-------------|-------------|-------------|
| H | -5.79784800 | -4.20822700 | 3.22574100  |
| C | -4.39614100 | -3.90598100 | 1.63740700  |
| H | -4.52101300 | -4.91933300 | 1.26277800  |
| C | -3.52020400 | -2.97886300 | 0.98841600  |
| C | -2.54084900 | -4.58434900 | -0.75536800 |
| C | -3.84250900 | -5.05796100 | -1.43599200 |
| H | -4.17978800 | -4.30658800 | -2.16602400 |
| H | -3.66573500 | -6.00277500 | -1.97449100 |
| H | -4.66614300 | -5.22655500 | -0.72915000 |
| C | -1.46339600 | -4.42110300 | -1.83953000 |
| H | -0.51811300 | -4.05661000 | -1.41702600 |
| H | -1.28902400 | -5.40510200 | -2.30322700 |
| H | -1.77032800 | -3.71256600 | -2.61818000 |
| C | -2.01422300 | -5.60603100 | 0.27357100  |
| H | -2.70713900 | -5.79667800 | 1.10285000  |
| H | -1.82089200 | -6.56860100 | -0.22585200 |
| H | -1.06689500 | -5.24933700 | 0.70507300  |
| C | -4.43299600 | -0.58176900 | -2.17913900 |
| H | -3.71990300 | -1.39909100 | -2.32975100 |
| C | -5.56731200 | -0.44806700 | -2.96658900 |
| H | -5.77882800 | -1.15386100 | -3.77186000 |
| C | -6.43200900 | 0.62572400  | -2.66522900 |
| H | -7.34698900 | 0.78069700  | -3.24520200 |
| C | -6.14213800 | 1.48789800  | -1.62514700 |
| H | -6.83332100 | 2.29676900  | -1.40196400 |
| C | -4.94794500 | 1.29254400  | -0.85680600 |
| C | -5.24781500 | 3.28391800  | 0.71303400  |
| C | -4.43287900 | 3.86024000  | 1.88115200  |
| H | -3.40059600 | 4.08309800  | 1.58411300  |
| H | -4.91627900 | 4.79319300  | 2.21104100  |
| H | -4.40850100 | 3.16910500  | 2.73428400  |
| C | -6.64203800 | 2.91118400  | 1.26238000  |
| H | -6.54217800 | 2.13698900  | 2.03813100  |
| H | -7.11399000 | 3.79533600  | 1.71999200  |
| H | -7.32956800 | 2.52645100  | 0.49863900  |
| C | -5.31551700 | 4.37042300  | -0.38186800 |
| H | -5.84015900 | 4.04603700  | -1.28944700 |
| H | -5.83565600 | 5.26169700  | 0.00394700  |
| H | -4.29821300 | 4.67004600  | -0.67565600 |
| C | 1.55801700  | -1.78680200 | -3.20489100 |
| H | 2.50930500  | -2.11765500 | -2.78105200 |
| C | 0.98973700  | -2.39719400 | -4.31782600 |
| H | 1.50512000  | -3.21870600 | -4.82002700 |
| C | -0.27761300 | -1.95828800 | -4.73008200 |
| H | -0.79545500 | -2.44510000 | -5.56167700 |
| C | -0.89613600 | -0.92168200 | -4.04281000 |

|   |             |             |             |  |
|---|-------------|-------------|-------------|--|
| H | -1.91209300 | -0.61778400 | -4.28843900 |  |
| C | -1.02198400 | 2.08916200  | -2.97266900 |  |
| C | 0.33564800  | 2.59944200  | -3.48034000 |  |
| H | 1.05905000  | 2.66218800  | -2.65591000 |  |
| H | 0.75190600  | 1.93856600  | -4.25701600 |  |
| H | 0.22468900  | 3.60383000  | -3.91918900 |  |
| C | -2.01117400 | 1.94542500  | -4.13819500 |  |
| H | -2.26271200 | 2.95209500  | -4.50660500 |  |
| H | -1.58727600 | 1.39254600  | -4.98813500 |  |
| H | -2.94720200 | 1.46201200  | -3.81919800 |  |
| C | -1.60705600 | 3.07773300  | -1.95506200 |  |
| H | -0.91396700 | 3.24298400  | -1.12140500 |  |
| H | -1.79205300 | 4.03930700  | -2.45971000 |  |
| H | -2.56185700 | 2.71689400  | -1.54595800 |  |
| C | -0.21531200 | -0.30300200 | -2.96972200 |  |
